1  
2  
3  
4  
5  
6  
7  
8  
9  
10  
11  
12  
13  
14  
15  
16  
17  
18  
19  
20  
21  
22  
23  
24  
25  
26  
27  
28  
29

**Mutations in Parkinsonism-linked endocytic proteins synaptojanin1 and auxilin have synergistic effects on dopaminergic axonal pathology**

Xin Yi Ng<sup>1</sup>, Yumei Wu<sup>3,5</sup>, Youneng Lin<sup>1,5</sup>, Sidra Mohamed Yaqoob<sup>1,5</sup>, Lois E. Greene<sup>4</sup>, Pietro De Camilli<sup>3</sup>, and Mian Cao<sup>1,2\*</sup>

1. Programme in Neuroscience and Behavioural Disorders, Duke-NUS Medical School, Singapore
2. Department of Physiology, National University of Singapore, Singapore
3. Departments of Neuroscience and Cell Biology, Howard Hughes Medical Institute, Program in Cellular Neuroscience, Neurodegeneration and Repair, Kavli Institute for Neuroscience, Yale University School of Medicine, New Haven, CT 06510, USA. Aligning Science Across Parkinson's (ASAP) Collaborative Research Network, Chevy Chase, MD.
4. Laboratory of Cell Biology, NHLBI, National Institutes of Health, MD, USA

5. These authors contributed equally

\* Corresponding Author

Contact Information: [mian.cao@duke-nus.edu.sg](mailto:mian.cao@duke-nus.edu.sg)

-----

Other authors' emails:

Xin Yi Ng: [xinyi.ng@duke-nus.edu.sg](mailto:xinyi.ng@duke-nus.edu.sg)

Yumei Wu: [yumei.wu@yale.edu](mailto:yumei.wu@yale.edu)

Youneng Lin: [youneng.lin@duke-nus.edu.sg](mailto:youneng.lin@duke-nus.edu.sg)

Sidra Mohamed Yaqoob: [sidra.yaqoob@u.duke.nus.edu](mailto:sidra.yaqoob@u.duke.nus.edu)

Lois E. Greene: [greenel@nhlbi.nih.gov](mailto:greenel@nhlbi.nih.gov)

Pietro De Camilli: [pietro.decamilli@yale.edu](mailto:pietro.decamilli@yale.edu)

30 **Abstract**

31 Parkinson's disease (PD) is a neurodegenerative disorder characterized by defective  
32 dopaminergic (DAergic) input to the striatum. Mutations in two genes encoding synaptically  
33 enriched clathrin-uncoating factors, synaptojanin 1 (SJ1) and auxilin, have been implicated in  
34 atypical Parkinsonism. SJ1 knock-in (SJ1-KI<sup>RQ</sup>) mice carrying a disease-linked mutation display  
35 neurological manifestations reminiscent of Parkinsonism. Here we report that auxilin knockout  
36 (Aux-KO) mice display dystrophic changes of a subset of nigrostriatal DAergic terminals similar  
37 to those of SJ1-KI<sup>RQ</sup> mice. Furthermore, Aux-KO/SJ1-KI<sup>RQ</sup> double mutant mice have shorter  
38 lifespan and more severe synaptic defects than single mutant mice. These include increase in  
39 dystrophic striatal nerve terminals positive for DAergic markers and for the PD risk protein  
40 SV2C, as well as adaptive changes in striatal interneurons. The synergistic effect of the two  
41 mutations demonstrates a special lability of DAergic neurons to defects in clathrin uncoating,  
42 with implications for PD pathogenesis in at least some forms of this condition.

43

44 **Key words:** Synaptojanin1, clathrin, DAergic terminals, Parkinsonism, DNAJC6/PARK19,  
45 SYNJ1/PARK20, PI4P, PI(4,5)P<sub>2</sub>, inositol-phosphatase, GAK.

46

## 47 **Introduction**

48 Recessive loss-of-function (LOF) mutations in two genes *SYNJ1* (*PARK20*) and *DNAJC6*  
49 (*PARK19*), which encode the pre-synaptically enriched proteins synaptojanin 1 (SJ1) and  
50 auxilin, were reported in rare cases of familial recessive juvenile/early-onset atypical  
51 Parkinsonism <sup>1-4</sup>. Interestingly, these two proteins function at different steps, albeit  
52 synergistically, in the shedding of the clathrin coat that follows clathrin-dependent vesicle  
53 budding to generate new synaptic vesicles (SVs) (Fig. 2A) <sup>5</sup>. SJ1, a phosphatase that  
54 sequentially dephosphorylates PI(4,5)P<sub>2</sub> via tandemly arranged 5-phosphatase and 4-  
55 phosphatase domains, mediates the dissociation of the endocytic clathrin adaptors (the inner  
56 layer of the coat), whose membrane interaction is PI(4,5)P<sub>2</sub> dependent <sup>6</sup>. Auxilin, a clathrin-  
57 binding co-chaperone, recruits the ATPase HSC70 to disassemble the clathrin lattice, i.e.  
58 outer layer of the coat <sup>6</sup>. Moreover, since auxilin contains a binding domain for  
59 monophosphoinositides <sup>7</sup>, its recruitment was proposed to be controlled, at least in part by the  
60 activity of SJ1.

61 Complete LOF of SJ1 results in early postnatal death <sup>8,9</sup>, while the R258Q mutation  
62 responsible for Parkinsonism selectively impairs the function of its 4-phosphatase domain  
63 (also called Sac domain) <sup>2</sup>. In the case of auxilin, Parkinsonism mutations result in complete  
64 or very strong loss of function <sup>10</sup>. Patients affected by Parkinsonism carrying mutations in these  
65 two genes share similar clinical manifestations: early- or juvenile-onset, typical motor deficits  
66 with atypical epilepsy and, in some patients, developmental delay and/or DA deficiency as  
67 detected by reduced DaTScan signal in the striatum <sup>11,12</sup>.

68 Several animal models have been generated and characterized for both Parkinsonism genes.  
69 Knock-in (KI) mice carrying the Sac domain mutation R258Q (R259Q in mice, referred  
70 henceforth as SJ1-KI<sup>RQ</sup> mice), recapitulated patients' neurological manifestations <sup>13</sup>. Nerve  
71 terminals of these mice exhibited accumulation of clathrin coated vesicles (CCVs) and SVs  
72 endocytic defects. Importantly, selective synaptic abnormalities were observed in nigrostriatal

73 DAergic nerve terminals of these mice, i.e. the axonal projections specifically degenerated in  
74 PD<sup>13</sup>. Perturbations in autophagosome formation were also reported in neuronal cultures of  
75 these mice<sup>14</sup>, in patient iPSC-derived human DA neuronal models carrying the same mutation  
76 and in nerve terminals of *Drosophila* carrying the corresponding mutation<sup>15</sup>. Motor symptoms,  
77 endocytic defects at synapses and degeneration of DAergic nerve terminals were also  
78 reported in aged SJ1 Heterozygous (+/-) mice<sup>16</sup>. Moreover, a strong synthetic interaction was  
79 observed in mice between the SJ1 R258Q mutation and the loss of Sac2, a PI4P phosphatase  
80 shown by GWAS to be a candidate PD risk gene<sup>17</sup>.

81

82 LOF animal models of auxilin also have features of PD pathogenesis. Reduced auxilin level  
83 in *Drosophila* leads to PD-like motor symptoms and accelerates  $\alpha$ -synuclein mediated DA  
84 neuron loss<sup>18</sup>. Auxilin mutant flies are also more sensitive to the environmental toxin paraquat  
85<sup>18</sup>. Auxilin KO mice (Aux-KO mice) are born with a lower than normal mendelian ratio and a  
86 subset of them die perinatally<sup>19</sup>. The brain levels of the auxilin paralogue, cyclin G-associated  
87 kinase (GAK), are upregulated in the surviving mice, and these mice were reported to have a  
88 normal lifespan, although a systematic analysis of their neurological performance was not  
89 carried out. In neuronal cultures derived from these mice, impaired SVs endocytosis and  
90 clathrin uncoating defects were observed<sup>19</sup>. Mice carrying the auxilin Parkinsonism-linked  
91 mutation R927G showed motor impairments in old mice, and both SVs recycling and Golgi  
92 trafficking defects<sup>20</sup>. Finally, in human midbrain-like organoids, mutations of auxilin were  
93 shown to cause key PD pathologic features and also developmental defects due to impaired  
94 WNT-LMX1A signaling<sup>21</sup>.

95

96 The implication in Parkinsonism of two genes that have cooperative function in clathrin  
97 uncoating during SVs recycling strongly suggest that their mutations result in Parkinsonism  
98 via the same, or very similar, pathogenetic mechanism. Elucidating such a mechanism may  
99 offer the possibility of developing intervention strategies to prevent the onset of Parkinsonism  
100 manifestations in individuals homozygous for these mutations. It is also possible that



101 mutations of other PD genes may converge on such mechanisms, so that studies on SJ1 and  
102 auxilin may have more general implications.

103

104 Here we set out to investigate whether loss of auxilin function in mice phenocopies the  
105 dystrophic changes that we have observed in the striata of SJ1-KI<sup>RQ</sup> mice and to determine  
106 whether the combined loss of auxilin and the Parkinsonism mutation of SJ1 results in  
107 synergistic effects on such changes. Our results demonstrate a similar effect of the two genetic  
108 perturbations on nigrostriatal DAergic nerve terminals. We also show that Aux-KO/SJ1-KI<sup>RQ</sup>  
109 double mutant mice have a much shorter lifespan than single mutants and more severe  
110 dystrophic changes in the striatum. Our results strengthen evidence for a vulnerability of  
111 nigrostriatal neurons to clathrin uncoating perturbations at synapses, and suggest that such  
112 dysfunction may play a role in at least some form of Parkinsonism.

113

## 114 **Results**

### 115 **Neurological defects in Aux-KO mice that survive early postnatal death**

116 As previously reported, a subset of Aux-KO mice die shortly after birth <sup>19</sup>. The survivors can  
117 have a lifespan similar to wild-type (WT) controls but a subset of them develop early-onset  
118 tonic-clonic epileptic seizures starting at 3-4 postnatal week (Supplementary Mov. 1), a finding  
119 also reported in the clinical cases carrying auxilin mutations. Hindlimb clasping phenotype, a  
120 sign of neurodegeneration, was observed in 30% of the mice at 1-month-old (Fig. 1A).  
121 Moreover, at 2-4 months they showed a mild fine motor deficit in the balanced beam test with  
122 significantly more missteps as they walk along the beam (Fig. 1B, C and Supplementary Mov.  
123 2A, 2B), while their performance on rotarod (gross motor) was normal (Fig. 1D). These results  
124 show that Aux-KO mice have at least some of the features observed in patients carrying auxilin  
125 Parkinsonism mutations.

126

### 127 **Defects of DAergic nerve terminals in the dorsal striatum of Aux-KO mice**

128 The previously reported analysis of cultured neurons of Aux-KO mice demonstrated  
129 perturbations consistent with a defect in clathrin uncoating. To examine the impact of auxilin  
130 LOF on the DAergic nigrostriatal pathway, we performed immunohistochemistry on brain  
131 frozen sections using antibodies directed against tyrosine hydroxylase (TH) and the plasma  
132 membrane dopamine transporter (DAT), both markers of DA neurons. Similar to SJ1-KI<sup>RQ</sup>  
133 mice, scattered abnormal TH- and DAT-positive clusters, were observed in the striata of these  
134 mice, but not in WT and heterozygous littermates, in addition to the normal diffuse punctate  
135 immunoreactivity representing axon terminal varicosities of DAergic neurons (Fig. 1E, F).  
136 Typically, these clusters were localized next to the soma of striatal neurons. Interestingly, as  
137 in the case of SJ1-KI<sup>RQ</sup> brains, these clusters were specifically present in the dorsal but not  
138 ventral striatum (Fig. 1E). Thus, nerve terminals of the nigrostriatal DA system are selectively  
139 and similarly affected by either complete LOF of auxilin or the R258Q mutation in SJ1, two  
140 genetic perturbations that result in Parkinsonism in human patients. Tiny DAT-positive clusters  
141 first appeared at about 3-week and large clusters positive for both DAT and TH peaked at 1-  
142 2 months. However, in both adult (5-month) and aged mice (12-month), the number of these  
143 clusters was significantly reduced (Fig. 1G, H), similar to what we observed in SJ1-KI<sup>RQ</sup> mice  
144 (Fig. 1I, J). Possibly, structural changes of a subset of DAergic nerve terminals only occurs at  
145 a young age and these terminals eventually degenerate. However, the occurrence of a repair  
146 mechanism cannot be excluded.

147

#### 148 **More severe neurological phenotypes in Aux-KO/SJ1-KI<sup>RQ</sup> double mutant mice than in** 149 **single mutant mice**

150 The similar clinical phenotypes of Parkinsonism mutations in SJ1 (RQ mutation) and auxilin  
151 (complete LOF) as well as the similar cellular and histological phenotypes observed in SJ1-  
152 KI<sup>RQ</sup> and Aux-KO mice prompted us to examine a synergistic effect of the two genetic  
153 disruptions by generating Aux-KO/SJ1-KI<sup>RQ</sup> double mutant mice. As shown in Fig. 2B, Aux-  
154 KO/SJ1-KI<sup>RQ</sup> mice have much shorter lifespan compared to either single mutant mice,  
155 revealing a strong synthetic genetic interaction. About 75% of Aux-KO/SJ1-KI<sup>RQ</sup> mice died

156 within 1 month after birth. Moreover, they were usually smaller in size (Supplementary Fig. 1A,  
157 B) and showed hindlimb claspings and seizures. The level of Neuropeptide Y (NPY) was  
158 dramatically increased in dentate gyrus (DG) mossy fibers in Aux-KO/SJ1-KI<sup>RQ</sup> hippocampus,  
159 compared to single mutants and controls, most likely a sign of frequent epileptic seizures<sup>22,23</sup>  
160 (Supplementary Fig. 1C, D). To date, only one Aux-KO/SJ1-KI<sup>RQ</sup> mouse out of more than 50  
161 survived to adulthood and died suddenly at 7-month-old. As assessed by the balanced beam  
162 test and by immunohistological analysis, this mouse had more severe motor coordination  
163 defect and DAergic terminal dystrophy in the striatum compared to single mutant mice  
164 (Supplementary Mov. 3A-D and Supplementary Fig. 1E)

165  
166 Hematoxylin and eosin (H&E) staining of Aux-KO/SJ1-KI<sup>RQ</sup> mouse brains at 1-month of age  
167 (the age at which nearly 25% of the double mutant mice survived) revealed a normal brain  
168 architecture (Supplementary Fig. 2). Likewise, no obvious gliosis was observed in different  
169 brain regions upon immunostaining with ionized calcium-binding adapter molecule (Iba1), a  
170 microglia marker and glial fibrillary acidic protein (GFAP), an astrocyte marker (Supplementary  
171 Fig. 3A, B). Moreover, western blot analysis of total homogenates of brains at the same age  
172 showed that the levels of major synaptic proteins tested, including SV proteins, endocytic  
173 proteins and proteins of DA metabolism were unchanged at this age, with the exception of a  
174 modest upregulation in amphiphysin 2 and endophilin1 of SJ1-KI<sup>RQ</sup> mice (Supplementary Fig.  
175 4A, B).

176  
177 **Synergistic disrupting effects of auxilin and SJ1 mutations on clathrin coat dynamics**  
178 **in nerve terminals**

179 Synapses of either Aux-KO or SJ1-KI<sup>RQ</sup> mice display abnormal presynaptic clustering of  
180 endocytic factors, as revealed by immunofluorescence (Fig. 2C, D), and an accumulation of  
181 CCVs as well as empty clathrin cages in the case of Aux-KO neurons, as revealed by electron  
182 microscopy (EM) (Fig. 3). These defects, which result in defective endocytic recycling of SVs,  
183 are not restricted to DAergic nerve terminals, in agreement with the ubiquitous expression of

184 SJ1 and auxilin in neurons. Moreover, they are generally more prominent at inhibitory nerve  
185 terminals as labeled by GAD65, which have higher tonic levels of activity (Fig. 2E, F). Both  
186 these defects were more severe at synapses of double mutant neurons. At these synapses,  
187 the fluorescence intensity of clusters of endocytic proteins, such as clathrin, adaptor protein 2  
188 (AP2), SJ1, amphiphysin 1 and amphiphysin 2, which was already higher in Aux-KO and SJ1-  
189 KI<sup>RQ</sup> single mutant neurons than in controls, was even higher in Aux-KO/SJ1-KI<sup>RQ</sup> neurons  
190 (Fig. 2C, D).

191

192 A synergistic effect of the two mutations could also be observed by EM, as shown by  
193 representative EM micrographs in Fig. 3A, and by a morphometric analysis of CCVs and  
194 empty clathrin cages in nerve terminals of the striatum (Fig. 3B). As expected, the SJ1-KI<sup>RQ</sup>  
195 mutation resulted primarily in an increase in CCVs and the Aux-KO mutation also resulted in  
196 an increase of empty clathrin cages, but the combination of the two mutations led to an overall  
197 increase in assembled clathrin (both cages and coated vesicles). At some inhibitory synapses  
198 in other regions of the brain such increase was huge, as illustrated by the three examples of  
199 inhibitory nerve terminals in the deep cerebellar nuclei shown in Fig. 3C that show massive  
200 accumulations of empty clathrin cages and CCVs.

201

### 202 **Enhanced dystrophic changes in the striatum of Aux-KO/SJ1-KI<sup>RQ</sup> double mutant mice**

203 We next focused on the DA system in both midbrain and striatum. The morphology of neurons  
204 positive for TH and for aromatic L-amino acid decarboxylase (AADC, the enzyme that acts  
205 downstream of TH to convert levodopa into DA and is thus another marker of DAergic neurons)  
206 in both substantia nigra (SN) and ventral tegmental area (VTA) appeared normal in 1-month-  
207 old Aux-KO/SJ1-KI<sup>RQ</sup> mice when compared to WT controls (Supplementary Fig. 5A).  
208 Stereological counting showed no significant loss of TH-positive neurons in either SN or VTA  
209 in Aux-KO/SJ1-KI<sup>RQ</sup> midbrain at this age (Supplementary Fig. 5B). However, in the striatum  
210 of Aux-KO/SJ1-KI<sup>RQ</sup> mice, the DAergic nerve terminal dystrophic phenotype was more severe  
211 than in the single mutant mice. The number of TH/DAT-positive clusters was significantly

212 increased compared to single mutants (Fig. 4A, B, E). More importantly, similar TH/DAT-  
213 positive clusters were also observed in the ventral striatum (including both the nucleus  
214 accumbens and olfactory tubercle) of Aux-KO/SJ1-KI<sup>RQ</sup> mice, but not of the single mutant mice  
215 (Fig. 4C, D, F and Supplementary Fig. 5C, 6). Since the ventral striatum receives DAergic  
216 axonal input from the VTA of the midbrain, this result indicates that the combined perturbation  
217 of auxilin and SJ1 affects the function of midbrain DAergic neurons more globally. It suggests  
218 a vulnerability of both SN and VTA DAergic neurons to the combined loss of SJ1 and auxilin,  
219 but a lower tolerance of SN neurons to the loss of either one of these two proteins.

220

221 EM observations of SJ1-KI<sup>RQ</sup> striata had shown that the presence of TH/DAT-positive clusters  
222 correlated with the occurrence of abnormal nerve terminals characterized by peculiar onion-  
223 like plasma membrane accumulations. Accordingly, similar structures were detected by EM in  
224 both auxilin KO and Aux-KO/SJ1-KI<sup>RQ</sup> striata (Fig. 5). Moreover, EM analysis confirmed that  
225 the increase of TH/DAT-positive clusters corresponded to an increase in the number of onion-  
226 like plasma membrane derived structures. While these structures were difficult to be found in  
227 thin sections of single mutant mice due to their scattered distribution, they were much easier  
228 to be found in thin section of double mutant striata, confirming their abundance. Red  
229 arrowheads in Fig. 5 show that they represent plasma membrane invagination. Lamellae  
230 sometimes contained scattered small SV clusters or CCVs consistent with their axonal nature.  
231 Moreover, anti-TH immunogold labeling confirmed that these structures corresponded to TH  
232 accumulations (Supplementary Fig. 7).

233

234 Immunofluorescence for a variety of nerve terminal proteins and specific components of the  
235 DAergic system revealed co-enrichment of several other proteins with TH and DAT in these  
236 structures in Aux-KO/SJ1-KI<sup>RQ</sup> mice. These include AADC (Fig. 6A, G), the plasma membrane  
237 marker SNAP25 (Fig. 6B, G) and a subset of SV proteins, such as synaptic vesicle  
238 glycoprotein 2C (SV2C) (Fig. 6C, G) and synaptotagmin 1 (Syt1) (Supplementary Fig. 8C) but  
239 not other SV house-keeping proteins such as SV2B (Fig. 6D, G) and synapsin (Supplementary

240 Fig. 8D). Both AADC and SV2C were also clustered with TH/DAT in Aux-KO or SJ1-KI<sup>RQ</sup>  
241 striatum (Supplementary Fig. 8A, B). Given the very low numbers of SVs in the onion-like  
242 structures but the abundance of plasma membrane, SV2C and Syt1 may have been more  
243 prone than others to become stranded in the plasma membrane in double mutant neurons.  
244 SV2C immunoreactivity was particularly strong consistent with a preferential expression of this  
245 SV2 isoform in the striatum and the midbrain, relative to SV2A and SV2B (<http://dropviz.org/>  
246 and <sup>24,25</sup>). It is also worth to note that gene encoding SV2C was recently identified as a PD risk  
247 locus <sup>26,27</sup>. Importantly, the abnormal SNAP25 positive clusters were not observed in other  
248 brain regions, suggesting a selective impairment in the striatum (Supplementary Fig. 9A, B).  
249 None of the endocytic proteins tested, including clathrin light chain (CLC) and endophilin 1  
250 were found in these aggregates (Fig. 6E, F, G), in agreement with the absence of  
251 accumulation of endocytic intermediates observed by EM at these sites.

252

253 Consistent with the occurrence of dystrophic changes of DAergic axons, measurements of the  
254 total content of DA in the striatum at 1-month old using HPLC, showed that DA levels were  
255 significantly decreased in striata of Aux-KO/SJ1-KI<sup>RQ</sup> mice compared to those of single  
256 mutants and controls (Fig. 6H).

257

### 258 **Adaptive upregulation of striatal TH/AADC-positive interneuron and SV2C-positive** 259 **cholinergic interneurons in Aux-KO/SJ1-KI<sup>RQ</sup> mice.**

260 Most interestingly, we also detected some protein expression changes in local striatal neurons  
261 of Aux-KO/SJ1-KI<sup>RQ</sup> mice. First, in sections of mutant striata immunolabeled with anti-TH  
262 antibody, in addition to the presence of TH-positive normal and abnormal nerve terminals  
263 which co-localized with DAT immunoreactivity, we also observed sparsely distributed TH-  
264 positive interneuron (THIN) cell bodies, different from Darpp32-positive medium spiny neurons  
265 (MSNs) which account for the predominant population in the striatum (Supplementary Fig.  
266 10A). These neurons were not visible in WT and Aux-KO striata, and were only occasionally  
267 observed in SJ1-KI<sup>RQ</sup> (Fig. 7A, B). Such neurons were positive for AADC (Fig. 7D, G),

268 suggesting that they could possibly generate DA, however, they were also shown to be  
269 positive for GABA (Supplementary Fig. 10B), and negative for DAT (Fig. 7C, G). Second, we  
270 detected another neuronal population which was strongly labeled with two different SV2C  
271 antibodies in Aux-KO/SJ1-KI<sup>RQ</sup> striata (Fig. 7E and Supplementary Fig. 10C, D). These SV2C-  
272 positive neuronal cell bodies did not overlap with TH/AADC-positive neurons, but were all  
273 positive for choline acetyltransferase (ChAT), a marker of striatal cholinergic interneurons  
274 (CHINs) (Fig. 7E, F, G and Supplementary Fig. 10C, D). Compared to WT sections, SV2C  
275 expression was much higher in a subset of ChAT-positive neurons in Aux-KO/SJ1-KI<sup>RQ</sup> (Fig.  
276 7H, I and Supplementary Fig. 10E, F). The intensity, number and distribution of ChAT remains  
277 unchanged between WT and Aux-KO/SJ1-KI<sup>RQ</sup> (Fig. 7H, I), suggesting this is a specific  
278 upregulation of SV2C in the CHINs. We further examined other cell types in the striatum using  
279 immunofluorescence against Darpp32 for MSNs, GFAP for astrocytes and Iba1 for microglia.  
280 Both MSNs and glia cells appeared normal in morphology, localization and fluorescence  
281 intensity (Supplementary Fig. 8E, F, G). Collectively, these findings suggest that the local  
282 striatal microcircuitry has been affected in Aux-KO/SJ1-KI<sup>RQ</sup> mutant mice, possibly as a result  
283 of DA deficiency and impaired DAergic innervation.

284

## 285 **Discussion**

286 In this study, we show that LOF mutations in two Parkinsonism-linked proteins implicated in  
287 endocytic clathrin-mediated budding at synapses, SJ1 and auxilin, produce similar dystrophic  
288 changes of nigrostriatal DAergic nerve terminals. Moreover, we show a strong synthetic  
289 interaction of SJ1 Parkinsonism mutation and auxilin KO. These findings provide striking  
290 evidence for the proposed functional partnership of the two proteins in clathrin coat shedding,  
291 with the phosphoinositide phosphatase activity of SJ1 being responsible for the dissociation of  
292 the clathrin adaptors from the membrane and auxilin playing a critical role, along with the  
293 chaperone HSC70, in the disassembly of the clathrin coat. In fact, the phosphoinositide  
294 phosphatase activity of SJ1 was proposed to help recruit auxilin. Importantly, they point to  
295 dysfunction in clathrin uncoating as one of the perturbations that can lead to juvenile/early-



296 onset Parkinsonism. How such dysfunction in turn leads to disease remains to be further  
297 clarified. Mechanisms may include a defect in SVs recycling with an impact on DA release,  
298 other alterations of synaptic membrane traffic such as impairment of autophagosome  
299 formation and sequestration of critical factors by assembled clathrin. As SJ1 and auxilin are  
300 neuronal housekeeping proteins, a major open question is why is the DAergic system more  
301 severely affected, although, as previously shown by us and others, synaptic defects in SJ1-  
302 KI<sup>RQ</sup> and auxilin mutant mice are not restricted to DAergic neurons.

303

304 Aux-KO mice have phenotypic manifestations that resemble those of SJ1-KI<sup>RQ</sup> mice, and both  
305 of them recapitulate some of the manifestations of human Parkinsonism patients carrying  
306 mutations in the DNAJC6/PARK19 and the SYNJ1/PARK20 genes. However, the neurological  
307 defects of Aux-KO mice are less severe than those of SJ1-KI<sup>RQ</sup> mice. This is probably due to  
308 the presence and compensatory upregulation of the auxilin paralogue auxilin-2/GAK in Aux-  
309 KO mouse brains <sup>19</sup>. GAK itself was identified as a PD risk gene via a GWAS study <sup>28</sup>.

310

311 Both the SJ1-KI<sup>RQ</sup> mouse model and the Aux-KO model have been reported to show  
312 presynaptic clustering of endocytic factors and accumulations of assembled clathrin <sup>13,19</sup>.  
313 These clathrin structures were different in the two genotypes: primarily CCVs in SJ1-KI<sup>RQ</sup> mice  
314 while empty clathrin cages in Aux-KO mice, as in the absence of auxilin spontaneously  
315 assembled cytosolic clathrin does not disassemble. These changes were widespread across  
316 the brain, but more prominent at inhibitory synapses, probably due to the tonic firing pattern  
317 in these synapses which requires more efficient SVs recycling, hence making these synapses  
318 more vulnerable to endocytic defects. A similar difference in the impact of endocytic protein  
319 mutations on excitatory and inhibitory synapses was also observed in SJ1 KO <sup>29</sup> and dynamin  
320 KO mice <sup>30</sup>. The imbalanced excitatory/inhibitory synaptic transmission in SJ1-KI<sup>RQ</sup> mice and  
321 Aux-KO mice could explain the epileptic seizures observed in both human patients and mice  
322 with mutations in SJ1 and auxilin.

323



324 The most interesting new observation that we have made in Aux-KO mice is the occurrence  
325 of histological defects in their striatum which are similar to those that we had observed in the  
326 striatum of SJ1-KI<sup>RQ</sup> mice<sup>13</sup>. These consist of TH/DAT-positive structures, also enriched in the  
327 plasma membrane protein SNAP25, that reflect presence of dystrophic DAergic nerve  
328 terminals and correlate with abnormal onion-like plasma membrane infoldings detectable by  
329 EM. The occurrence of these histological/cellular phenotypes in both mutant mouse models  
330 suggests a special liability of nigrostriatal DA neurons to perturbation of endocytic clathrin coat  
331 dynamics, which may be relevant to PD pathogenesis.

332

333 Possibly, as we discussed in our study of SJ1-KI<sup>RQ</sup> mice, these onion-like invaginations of the  
334 plasma membrane are the result of endocytic impairment at a subset of synapses. However,  
335 they are not enriched with endocytic proteins nor several house-keeping SV proteins,  
336 consistent with the lack of enrichment of SVs in these terminals. Surprisingly, they are  
337 enriched in SV2C, which is the SV2 family member expressed in DAergic neurons and also a  
338 modulator of DA release<sup>24</sup>. Interestingly, the gene encoding SV2C was recently identified by  
339 GWAS from both Asian and European cohorts as a PD risk locus<sup>26,27</sup>. Moreover, in both Aux-  
340 KO and SJ1-KI<sup>RQ</sup> mice, dystrophic DAergic nerve terminals in the striatum peak in abundance  
341 at 1-2 months but gradually decreased (5 and 12 months), indicating either repair mechanisms  
342 or removal of degenerated nerve terminals in older mice. Interestingly, a follow up study on  
343 Parkinsonism patients carrying the SJ1 RQ mutation showed relative stability of clinical  
344 manifestations at later stages<sup>31</sup>. The early-onset feature in both the Aux-KO and SJ1-KI<sup>RQ</sup>  
345 mice also suggests there may be some neurodevelopmental defects in these mouse models.  
346 Indeed, Parkinsonism patients carrying both genes' mutations suffer from developmental  
347 delay<sup>11,12</sup>, and a recent study of human midbrain-like organoids carrying the auxilin  
348 Parkinsonism mutation also showed impaired WNT-LMX1A signaling during DA neuron  
349 development<sup>21</sup>.

350

351 The strong synthetic effect of the SJ1-KI<sup>RQ</sup> mutation and the Aux-KO mutation is a key result  
352 that provides evidence for a similar pathogenetic mechanism resulting from mutations in these  
353 two proteins. Relative to single mutants, double mutant mice have much shorter lifespan and  
354 usually die between 3 to 4 weeks after birth, which is the critical period for neurodevelopment  
355 in rodents <sup>32</sup>. Moreover, they display enhanced clustering of endocytic proteins and more  
356 abundant dystrophic TH/DAT/AADC/SV2C-positive nerve terminals, which additionally are not  
357 restricted to the dorsal striatum as in single mutant mice, but are also present in the ventral  
358 striatum. Thus, there appears to be a special vulnerability of DAergic neurons to the combined  
359 SJ1 and auxilin perturbations in the SN and VTA that project to the dorsal and ventral striatum,  
360 respectively. One factor that may contribute to the vulnerability of DAergic neuron to  
361 disruptions of two endocytic proteins may be their tonic firing activity, which may require  
362 efficient SVs recycling to sustain continuous release of DA. However, this is not a unique  
363 property of these neurons, suggesting that other factors come into play.

364

365 A striking finding in Aux-KO/SJ1-KI<sup>RQ</sup> striata, besides the presence of dystrophic DAergic  
366 nerve terminals, was the occurrence of changes in two different types of interneurons, which  
367 likely reflect adaptive modifications. First, there was an increase in the number of TH-positive  
368 THINs. THINs were also positive for AADC, suggesting that they may synthesize DA. A similar  
369 increase was previously reported in neurotoxin-induced rodent and non-human primate PD  
370 models <sup>33,34</sup>, as well as in a genetic PD mouse model <sup>35</sup>, and was interpreted as a  
371 compensatory change due to loss of DAergic terminals. The increase that we have observed  
372 in Aux-KO/SJ1-KI<sup>RQ</sup> striata may have a similar explanation. However, DAT is not detected in  
373 these TH/AADC-positive interneurons, suggesting they are not “authentic” DA neurons <sup>36</sup>.  
374 Second, in addition to the accumulation of SV2C with TH and DAT in DAergic terminals, we  
375 also observed upregulated SV2C expression in the soma of another subset of striatal  
376 interneurons, the ChAT-positive giant ChINs. Expression of SV2C in striatal ChINs has  
377 previously been reported <sup>37,38</sup>, but such expression is robustly increased in Aux-KO/SJ1-KI<sup>RQ</sup>  
378 striata, while expression of ChAT remains relatively unchanged. Interestingly, a study

379 involving neurotoxin PD mouse models to deplete DA also showed a significant increase in  
380 striatal SV2C mRNA levels <sup>39</sup>. Considering that an imbalance of DAergic and cholinergic  
381 signals in the striatum is a feature of PD <sup>40</sup> and that SV2C has been linked by multiple studies  
382 to PD <sup>24,26,27,39,41</sup>, this adaptive change in Aux-KO/SJ1-KI<sup>RQ</sup> striata deserves further  
383 investigation.

384

385 In conclusion, we have reported here strong evidence for the hypothesis that mutations in SJ1  
386 and auxilin may lead to Parkinsonism via a similar pathogenetic mechanism. Several PD  
387 causative genes have now been identified. The next goal is to identify the cellular process  
388 onto which these genes functionally converge, as such identification will provide insight into  
389 pathogenetic mechanisms with implication for therapeutic approaches. After the well-  
390 established partnership of PINK1 and Parkin, the cooperation of SJ1 and auxilin is the second  
391 clear example of functional partnership between two PARK genes. Additionally, we previously  
392 reported a synergistic function of SJ1 with another phosphoinositide phosphatase, Sac2,  
393 which GWAS studies had indicated as a candidate PD risk gene. Thus, we anticipate that  
394 further studies of auxilin and SJ1 will provide valuable insight into mechanisms that are at the  
395 core of at least some form of PD.

396

## 397 **Methods and Materials**

### 398 **Animals**

399 Both the Aux-KO (RRID: MMRRC\_036980-JAX) and SJ1-KI<sup>RQ</sup> mice were generated as  
400 described before<sup>13,19</sup>. These two mouse models were crossed with each other to generate the  
401 Aux-KO/SJ1-KI<sup>RQ</sup> double-mutant mice. Mice were housed in SPF rooms with a 12-hour  
402 light/dark cycle. All experiments involving animals were conducted according to the protocol  
403 approved by SingHealth Institutional Animal Care and Use Committee (IACUC). WT or  
404 Heterozygous littermates of the mutant mice are used and defined as the control group.

405

### 406 **Antibodies**

407 The following primary antibodies were obtained from Dr Pietro De Camilli's lab at Yale  
408 University: rabbit anti-SJ1, rabbit anti-Auxilin, mouse anti-Amphiphysin 1, mouse anti-Clathrin  
409 Heavy Chain, rabbit anti-pan-Dynamin, rabbit anti-pan-Endophilin, mouse anti-GAD65, rabbit  
410 anti-SNAP25, rabbit anti-Synapsin, mouse anti-VAMP2, rabbit anti-Synaptophysin and mouse  
411 anti-Syt1. The other antibodies used in this study were obtained from commercial sources as  
412 stated: rabbit anti-LRRK2 (ab133474, RRID: AB\_2713963) from Abcam; mouse anti- $\alpha$ -  
413 synuclein (610786, RRID: AB\_2748880), mouse anti-AP2 (611350, RRID: AB\_398872) and  
414 mouse anti-Hip1R (612118, RRID: AB\_399489) from BD Biosciences; rabbit anti-DARPP-32  
415 (2306, RRID: AB\_823479) and rabbit anti-NPY (11976, RRID: AB\_2716286) from Cell  
416 Signaling Technology; mouse anti- $\alpha$ -adaptin (MA1-064, RRID: AB\_2258307) from Life  
417 Technologies; mouse anti-Amph2 (05-449, RRID: AB\_309738), goat anti-ChAT (AB144P,  
418 RRID: AB\_2079751), mouse anti-CLC (AB9884, RRID: AB\_992745), rat anti-DAT (MAB369,  
419 RRID: AB\_2190413), mouse anti-SV2C (MABN367, RRID: AB\_2905667) and rabbit anti-TH  
420 (AB152, RRID: AB\_390204) from Merck Millipore; mouse anti- $\beta$ -actin (sc-47778, RRID:  
421 AB\_2714189) and mouse anti-Hsc70 (sc-7298, RRID: AB\_627761) from Santa Cruz  
422 Biotechnology; rabbit anti-Auxilin (HPA031182, RRID: AB\_10611957), rabbit anti-GABA  
423 (A2052, RRID: AB\_477652), rabbit anti-GFAP (ZRB2383, RRID: AB\_2905668) and rabbit  
424 anti-SJ1 (HPA011916, RRID: AB\_1857692) from Sigma-Aldrich; rabbit anti-Amphiphysin 1

425 (120002, RRID: AB\_887690), rabbit anti-AADC (369003, RRID: AB\_2620131), rabbit anti-  
426 SV2B (119102, RRID: AB\_887803), rabbit anti-SV2C (119202, RRID: AB\_887803), rabbit  
427 anti-Synaptogyrin 3 (103 302, RRID: AB\_2619752), and rabbit anti-Syt11 (270003, RRID:  
428 AB\_2619994) from Synaptic Systems; rabbit anti-Iba1 (019-19741, RRID: AB\_839504) from  
429 FUJIFILM Wako Chemicals.

430

431 Secondary antibodies used were all purchased from commercial sources as stated: donkey  
432 anti-mouse IgG (H+L) Alexa Fluor 594 (A21203, RRID: AB\_141633), goat anti-mouse IgG  
433 (H+L) Alexa Fluor 488 (A11001, RRID: AB\_2534069), goat anti-mouse IgG (H+L) Alexa Fluor  
434 594 (A11032, RRID: AB\_2534091), goat anti-mouse IgG (H+L) Alexa Fluor 647 (A21236,  
435 RRID: AB\_2535805), donkey anti-rabbit IgG (H+L) Alexa Fluor 488 (A21206, RRID:  
436 AB\_2535792), goat anti-rabbit IgG (H+L) Alexa Fluor 488 (A11034, RRID: AB\_2576217), goat  
437 anti-rabbit IgG (H+L) Alexa Fluor 594 (A11037, RRID: AB\_2534095), goat anti-rabbit IgG (H+L)  
438 Alexa Fluor 647 (A21244, RRID: AB\_2535812), goat anti-rat IgG (H+L) Alexa Fluor 488  
439 (A11006, RRID: AB\_2534074), goat anti-rat IgG (H+L) Alexa Fluor 594 (A11007, RRID:  
440 AB\_10561522) and donkey anti-goat IgG (H+L) Alexa Fluor 488 (A11055, RRID: AB\_2534102)  
441 from Life Technologies and IRDye 800CW donkey anti-rabbit IgG (926-32213, RRID:  
442 AB\_621848), IRDye 800CW donkey anti-mouse IgG (926-32212, RRID: AB\_621847), IRDye  
443 680RD donkey anti-mouse IgG (926-68072, RRID: AB\_10953628) and IRDye 800CW goat  
444 anti-rat (926-32219, RRID: AB\_1850025) from LI-COR Biosciences.

445

#### 446 **Motor Behavioral tests**

447 Aux-KO and littermate control mice between 2-13 months old were used for balance beam  
448 and rotarod tests. The mice were divided into three age groups: 2-4 months old (n=13-15), 5-  
449 8 months old (n=7-12) and more than 9 months old (n=8-15) for each genotype. Both males  
450 and females were used for the behavioral assays. Both tests were conducted during the light  
451 period. The mice were allowed to acclimatize to the test for at least 30 min before each test.

#### 452 **Balance Beam Test**

453 A narrow beam (10 mm width) was suspended 15 cm above a soft padding. Mice were placed  
454 on end of the beam and during their trip towards the other end, the number of missteps (paw  
455 slips) was recorded. The test was conducted thrice for each mouse and the average number  
456 of missteps was calculated.

#### 457 **Rotarod Test**

458 Mice were placed on a rod which is rotating at 4 rpm with an acceleration to 40 rpm within 6  
459 min. The duration of the mice staying on the rod is measured two times at 10 min intervals  
460 and the average 'latency to fall' was determined for each mouse.

461

#### 462 **Immunoblotting**

463 Mouse brain tissues were homogenized in buffer containing 20 mM Tris-HCl (pH 7.4), 150  
464 mM NaCl, 2 mM EDTA and cOmplete™ EDTA-free Protease Inhibitor Cocktail (Roche, USA).  
465 The homogenized samples were centrifuged at 700 g for 10 min to obtain the post-nuclear  
466 supernatant (PNS). Protein concentration was determined by the Pierce BCA Protein Assay  
467 Kit. SDS-PAGE and western blotting were performed by standard procedures. The  
468 membranes were blotted with primary antibodies and then IRDye® Secondary Antibodies (LI-  
469 COR, USA). The protein bands were detected using Odyssey® CLx imaging system and its  
470 intensity was quantified via Image Studio Lite software (Ver 5.2, RRID: SCR\_013715). A  
471 minimum of three independent sets of samples were used for quantification.

472

#### 473 **Primary Cortical Neuron Culture and Staining**

474 Cultures of cortical neurons were prepared from P0 to P2 neonatal mouse brains by previously  
475 described methods<sup>42</sup> and used at DIV19. Cortical tissue was dissected out, placed in ice-cold  
476 HBSS, and diced into small pieces of less than 1 mm<sup>3</sup> per piece. Tissue was then digested for  
477 30 min in an activated enzyme solution containing papain (20 U/ml) and DNase (20 µg/ml) at  
478 37°C, followed by gentle trituration. The cell suspension is centrifuged at 300 g for  
479 5 min. The cell pellet is resuspended and plated onto poly-d-lysine-coated coverslips to a  
480 density of 60,000 cells/cm<sup>2</sup>. 2-3 hours after plating, the medium was exchanged to

481 Neurobasal/B27 serum-free medium, and cells were maintained at 37°C in a 5% CO<sub>2</sub>  
482 humidified incubator. Cells were fixed with 4% paraformaldehyde (PFA) and 4% sucrose in 1  
483 X PBS for 20 min, followed by 10 min incubation with 50 mM NH<sub>4</sub>Cl, then blocked and  
484 permeabilized with 5% bovine serum albumin (BSA), 1 X phosphate-buffered saline (PBS)  
485 and 0.1% Triton X-100. Primary and secondary antibody incubations were subsequently  
486 performed in the same buffer. Alexa 488, 594 and 647 conjugated secondary antibodies were  
487 purchased from Invitrogen. After washing, samples were mounted on slides with Fluoromount-  
488 G (Invitrogen). Samples were observed and imaged on a spinning disk system (Gataca  
489 Systems) based on an inverted microscope (Nikon Ti2-E; Nikon) equipped with a confocal  
490 spinning head (CSU-W, Yokogawa) and a Plan-Apo 60x oil TIRF objective. The same  
491 exposure time and laser intensity were used when imaging the same marker for all 4  
492 genotypes.

493

#### 494 **Brain Histology and Immunofluorescence**

495 Mice were anesthetized with a Ketamine/Xylazine anesthetic cocktail injection, perfused  
496 transcardially with ice-cold 4% PFA in 1X PBS and the brains were kept in the same fixative  
497 overnight at 4°C. On the next day, brains were transferred to 30% sucrose in 1 X PBS and  
498 kept overnight at 4°C on top of a roller. Brains were then embedded in OCT (Tissue-Tek) and  
499 freeze in liquid nitrogen-cooled 2-methylbutane (Isopentane). Coronal or sagittal sections of  
500 20 µm thickness were cut with a cryostat. The sections are either mounted on adhesive slide,  
501 SuperFrost® Plus (VWR) or collected as floating sections in 1 X PBS in a 24-well plate.  
502 Sections were then blocked in 5% BSA and 0.1% Triton X-100 in 1 X PBS for 1 hour at room  
503 temperature. After blocking, sections were incubated with primary antibodies (diluted in the  
504 same buffer) and kept overnight at 4°C. Subsequently, sections were washed 3 times for 10  
505 min with 0.1% Triton X-100 in 1 X PBS, then incubated with Alexa-conjugated secondary  
506 antibodies for 1 hour at room temperature. Finally, the sections were mounted with  
507 Fluoromount-G with or without DAPI (Invitrogen) and sealed with nail polish. The floating  
508 sections were mounted onto slides after all the staining procedures. Images were acquired



509 with a spinning disk system (Gataca Systems) based on an inverted microscope (Nikon Ti2-  
510 E; Nikon) equipped with a confocal spinning head (CSU-W, Yokogawa) and a Plan-Apo 40x  
511 oil objective. The same exposure time and laser intensity were used when imaging the same  
512 marker for all 4 genotypes.

513

514 For stereological analysis of TH-positive dopaminergic neurons in the midbrain, 30  $\mu\text{m}$  coronal  
515 section were collected, incubated with 0.1%  $\text{H}_2\text{O}_2$  for 20 minutes to quench endogenous  
516 peroxidase activity and subsequently incubated with buffer containing 5% BSA, 1X PBS and  
517 0.1% Triton X-100 for 1 hour at room temperature. Next, sections were incubated overnight at  
518  $4^\circ\text{C}$  with anti-TH primary antibody (1:1000). The sections were then washed with 1X PBS 3  
519 times for 10 minutes and incubated with a biotinylated anti-rabbit secondary antibody (Vector  
520 Laboratories, USA) for 1 hour at room temperature, later followed by incubation with  
521 Avidin/Biotin complex (ABC) reagent for 45 minutes at room temperature (Vector Laboratories  
522 PK-6200). Finally, immunoreactivity was revealed by incubation with diaminobenzidine (DAB)  
523 (Vector Laboratories SK-4100). Stereological analysis was performed using the optical  
524 fractionator probe in the Stereo Investigator software (MBF Bioscience, USA). A total of 9  
525 coronal sections (every 4<sup>th</sup> serial section across the midbrain) were collected for counting. The  
526 substantia nigra par compacta (SN) and ventral tegmental area (VTA) regions were outlined  
527 based on the Allen mouse brain atlas using 5x objective lens and counts were performed using  
528 60x oil objective lens. The parameters used include a counting frame size of 50 x 50  $\mu\text{m}$ , a  
529 sampling site of 132 x 71  $\mu\text{m}$ , a dissector height of 13  $\mu\text{m}$ , 2  $\mu\text{m}$  guard zones and coefficient  
530 of error (Gundersen,  $m=1$ ) were less than 0.1.

531

### 532 **Quantification of Immunoreactivity Clustering and TH-positive Striatal Interneurons**

533 The endocytic protein clustering quantification was conducted on the Fiji software (Version  
534 ImageJ 1.52p/Java 1.8.0\_172 (64-bit), RRID: SCR\_002285) as follows. The same threshold  
535 intensity was applied to all images and a random region of interest with an area of 500  $\mu\text{m}^2$   
536 was manually selected. A mask was used to selectively quantify puncta larger than 1  $\mu\text{m}^2$ .



537 The Fiji plugin “Analyze particles” was then used to measure average fluorescence intensity  
538 of the puncta.

539

540 The quantification of TH/DAT-positive clustering in striatum was also done similarly using Fiji  
541 software. In this case, for each mouse, 5 random sampling sites were selected respectively  
542 for both dorsal and ventral striatum. At least three mice from each genotype and each age  
543 group were collected for this purpose. The threshold setting for the clusters was set to quantify  
544 puncta bigger than  $5 \mu\text{m}^2$  to ensure normal positive axonal terminals were not counted in. The  
545 average number of clusters was counted automatically with Fiji plugin “Analyse Particles”  
546 based on all five random sampling sites for each mouse.

547

548 Quantification of the THINs were done with the same images used to quantify TH/DAT-positive  
549 clusters. The number of TH-positive cell bodies were counted from the 5 random sampling  
550 sites selected for the dorsal and ventral striatum respectively.

551

### 552 **Quantification of Striatal Cholinergic Interneurons (ChINs)**

553 The number of ChINs was quantified from individual coronal sections of the striatum double  
554 stained with ChAT and SV2C. Image acquisition involved tiling of the entire section using a  
555 20x Air lens, keeping the same laser intensity and exposure for both channels on MetaMorph  
556 Microscopy Automation and Image Analysis Software (RRID: SCR\_002368). Stitched images  
557 were then set to the same threshold intensity for each individual channel in Fiji software  
558 (Version ImageJ 1.52p/Java 1.8.0\_172 (64-bit), RRID: SCR\_002285). Cell Counter plugin was  
559 used to count visible cell bodies across the striatum (outlined on the basis of Allen mouse  
560 brain atlas). Percentage ratio of the cell count from individual channels was used as a measure  
561 of ChINs expressing SV2C.

562

563 Quantification of ChAT and SV2C intensities in ChINs was done with the same images used  
564 for quantifying number of cholinergic interneurons. Manually drawn ROIs were used to analyse

565 the intensities of 20 neurons randomly selected across the striatum. Corrected total cell  
566 fluorescence (CTCF) was calculated and the intensities of each channel were normalised to  
567 averaged control levels. For both genotypes, five individual mice were analysed for this  
568 purpose.

569

### 570 **Colocalization analysis**

571 Colocalization analysis was also performed on the Fiji software (Version ImageJ 1.52p/Java  
572 1.8.0\_172 (64-bit), RRID: SCR\_002285). For the quantification of colocalization of  
573 immunofluorescence signals in the clusters (both cortical endocytic clusters and striatal  
574 DAergic TH/DAT-positive clusters), the images are set to the same threshold to mask all the  
575 normal, healthy axon terminals. For colocalization analysis of Amph1/Gad65, 8-10 neurons  
576 were quantified for each genotype. For colocalization analysis of TH/DAT, 5 random sampling  
577 sites were selected respectively for both dorsal and ventral striatum of each mouse. At least  
578 three mice from each genotype were collected for this purpose. For the colocalization analysis  
579 of other markers with TH or DAT, 5-11 random sampling sites were selected from the dorsal  
580 striatum. Fiji plugin, JACoP<sup>43</sup>, was used to set the threshold and calculate Mander's coefficient.  
581 Only M1 values are reported. For the colocalization of immunofluorescence cell bodies' signal  
582 of THINs and ChINs, 7-10 soma from 3-4 random regions of interest (ROIs) of striatum were  
583 selected. JACoP was used to calculate Pearson's coefficient for colocalization analysis.

584

### 585 **Electron Microscopy (EM)**

586 All EM reagents were from EMS, Hatfield, PA, unless noted otherwise. 1-3 months old mice  
587 were anesthetized and fixed by transcardial perfusion with 4% formaldehyde and 0.125%  
588 glutaraldehyde in 0.1 M PB buffer. Brain were removed and dissected in small pieces (0.5 ×  
589 0.5 × 0.5 mm<sup>3</sup>) and further incubated in the same fixative at 4 °C overnight. Brain tissues were  
590 further incubated in 2.5% glutaraldehyde in 0.1 M sodium cacodylate buffer for additional 1  
591 hour at room temperature, post-fixed (1 hour) in 2% OsO<sub>4</sub>, 1.5% K<sub>4</sub>Fe(CN)<sub>6</sub> (Sigma-Aldrich,  
592 St. Louis, MO) in 0.1M sodium cacodylate buffer, stained (overnight) with 2% aqueous uranyl

593 acetate at 4 °C, dehydrated in gradually increasing concentration of EtoH, and embedded in  
594 Embed 812. Ultrathin sections, about 60 nm thick, were cut with a Leica ultramicrotome and  
595 examined in a Talos L120C TEM microscope at 80 kV. Images were taken with Velox software  
596 and a 4k × 4K Ceta CMOS Camera (Thermo Fisher Scientific). For quantification, images of  
597 synapses were selected based on the presence of an active zone. The number of SVs  
598 (diameter ≤ 80nm), CCVs, and clathrin cages was measured in more than 120 synapses for  
599 each control and mutant condition. These values were normalized to the cross-sectional area  
600 of the presynaptic terminal. Results of the morphometric analysis are presented as mean ±  
601 SEM. Statistical significance was evaluated using one-way ANOVA followed by Games-  
602 Howell's multiple comparison test.

603

#### 604 **Immunogold labelling**

605 Aux-KO/SJ1-KI<sup>RQ</sup> mice were transcardially perfused with 4% formaldehyde and 0.125%  
606 glutaraldehyde in 0.1M phosphate buffer (pH 7.4). Dorsal striata were dissected and  
607 embedded in 1% gelatin in 0.1M phosphate buffer. Tissue pieces were trimmed, infiltrated in  
608 2.3M sucrose, and then were frozen rapidly onto aluminium pins in liquid nitrogen. 60nm  
609 frozen sections on carbon/formvar coated grids were prepared with a Leica Cryo-EMUC6  
610 UltraCut microtome. Sections were labelled with rabbit anti-Tyrosine Hydroxylase (TH) and  
611 10nm Protein A gold (Utrecht Medical Center) <sup>44</sup>. Grids were examined in FEI Tecnai Biotwin  
612 TEM at 80Kv. Images were taken with Morada CCD and iTEM (Olympus) software.

613

#### 614 **HPLC analysis to detect striatal levels of dopamine**

615 Striatum tissues dissected from mice brain were homogenized in 0.5N perchloric acid with  
616 100µM of deferoxamine mesylate and 100µM of glutathione. The homogenized samples were  
617 further sonicated, centrifuged and the supernatants were filtered using 0.1 µm PVDF  
618 centrifugal filters before collecting the filtrates for HPLC analysis. A reversed-phase UltiMate  
619 3000 HPLC system (Thermo Fisher Scientific) with an electrochemical detector and a

620 reversed-phase column (Vydac Denali, C18, 4.6 x 250mm, 5 $\mu$ m particle size, 120 Å pore size)  
621 were used to run the samples. The HPLC run was performed at a flow rate of 0.5 ml per minute  
622 with a mobile phase containing 1.3% sodium acetate, 0.01% EDTA (pH8.0), 0.5% sodium 1-  
623 heptanesulfonate, 7% acetonitrile (v/v) and 2% methanol (v/v), adjusted to pH 4.0 with acetic  
624 acid. All buffers used for HPLC analysis were double filtered through 0.2  $\mu$ M nylon membranes.  
625 Dopamine in the samples was identified by retention time of dopamine standard (around 14  
626 min) and quantified by measuring the area under the peak using the software Chromeleon™  
627 7.2 Chromatography Data System (Thermo Fisher Scientific). The areas under the peaks were  
628 normalised to their respective tissue weight. 7 mice were used for each genotype for  
629 quantification.

630

### 631 **Statistical Analysis**

632 All statistical analysis was performed using GraphPad Prism (Ver 9.3.1, RRID: SCR\_002798).  
633 All graphs were also plotted on GraphPad Prism. Data are presented as mean  $\pm$  SEM unless  
634 otherwise stated. Statistical significance was determined using the Student's unpaired *t* test  
635 for the comparison of two independent groups or ANOVA with Tukey's Honest Significant  
636 Difference or Games-Howell's post hoc test for multiple group comparisons. Data with *p*-  
637 values <0.05, <0.01, <0.001, and <0.0001 are represented by asterisks \*, \*\*, \*\*\*, and \*\*\*\*.

638

639

640 **ABBREVIATIONS:**

- 641 AADC: Aromatic l-amino acid decarboxylase
- 642 AP2: Adaptor protein complex 2
- 643 CCVs: Clathrin coated vesicles
- 644 ChAT: Choline acetyltransferase
- 645 ChINs: Cholinergic interneurons
- 646 DA: Dopamine
- 647 DAergic: Dopaminergic
- 648 DAT: Dopamine transporter
- 649 GAK: Cyclin G-associated kinase
- 650 GFAP: Glial fibrillary acidic protein
- 651 GWAS: Genome-wide association study
- 652 H&E: Hematoxylin and eosin
- 653 Iba1: Ionized calcium-binding adapter molecule 1
- 654 KI: Knock-in
- 655 KO: Knockout
- 656 LOF: Loss-of-function
- 657 MSNs: Medium spiny neurons
- 658 NPY: Neuropeptide Y
- 659 PD: Parkinson's Disease
- 660 SJ1: Synaptojanin 1
- 661 SN: Substantia nigra
- 662 SVs: Synaptic vesicles
- 663 SV2: Synaptic vesicle glycoprotein 2
- 664 Syt1: Synaptotagmin 1
- 665 THINs: TH-positive interneurons
- 666 VTA: Ventral tegmental area
- 667

668

669 ***Acknowledgment***

670 We thank Morven Graham for technical help and Prof. Zhang Su-Chun for sharing the  
671 reagents. This research was supported in part by grants from Ministry of Education Academic  
672 Research Fund (AcRF) Tier 2 Singapore (MOE2019-T2-2-090) to MC, from the NIH (NS36251  
673 and DA18343), the Kavli Institute for Neuroscience, the Parkinson Foundation and the  
674 Aligning Science Across Parkinson's grant ASAP-000580 through the Michael J. Fox  
675 Foundation for Parkinson's Research (MJFF) to PDC. For the purpose of open access, the  
676 author has applied a CC BY public copyright license to all Author Accepted Manuscripts arising  
677 from this submission.

678

679 ***Author Contributions***

680 X.Y.N., P.D.C. and M.C. designed the experiments. X.Y.N., Y.W., Y.L., S.M.Y and M.C.  
681 performed the experiments. X.Y.N., P.D.C. and M.C. wrote the paper. L.E.G. provided Aux-  
682 KO mice. All authors read and approved the final manuscript.

683

684 ***Conflict of interest***

685 The authors declare that they have no conflict of interest. Pietro De Camilli is a member of  
686 the Scientific Advisory Board of CASMA Therapeutics.

687

688 ***Availability of data and materials***

689 The datasets generated and/or analyzed in this study are available from the corresponding  
690 author Mian Cao on request.

691

692 **Reference**

- 693 1 Quadri, M. *et al.* Mutation in the SYNJ1 gene associated with autosomal recessive,  
694 early-onset Parkinsonism. *Human mutation* **34**, 1208-1215, doi:10.1002/humu.22373  
695 (2013).
- 696 2 Krebs, C. E. *et al.* The Sac1 domain of SYNJ1 identified mutated in a family with  
697 early-onset progressive Parkinsonism with generalized seizures. *Human mutation*  
698 **34**, 1200-1207, doi:10.1002/humu.22372 (2013).
- 699 3 Edvardson, S. *et al.* A deleterious mutation in DNAJC6 encoding the neuronal-  
700 specific clathrin-uncoating co-chaperone auxilin, is associated with juvenile  
701 parkinsonism. *PLoS one* **7**, e36458, doi:10.1371/journal.pone.0036458 (2012).
- 702 4 Koroglu, C., Baysal, L., Cetinkaya, M., Karasoy, H. & Tolun, A. DNAJC6 is  
703 responsible for juvenile parkinsonism with phenotypic variability. *Parkinsonism Relat*  
704 *Disord* **19**, 320-324, doi:10.1016/j.parkreldis.2012.11.006 (2013).
- 705 5 Nguyen, M., Wong, Y. C., Ysselstein, D., Severino, A. & Krainc, D. Synaptic,  
706 Mitochondrial, and Lysosomal Dysfunction in Parkinson's Disease. *Trends Neurosci*  
707 **42**, 140-149, doi:10.1016/j.tins.2018.11.001 (2019).
- 708 6 Saheki, Y. & De Camilli, P. Synaptic vesicle endocytosis. *Cold Spring Harbor*  
709 *perspectives in biology* **4**, a005645, doi:10.1101/cshperspect.a005645 (2012).
- 710 7 Guan, R., Dai, H., Harrison, S. C. & Kirchhausen, T. Structure of the PTEN-like  
711 region of auxilin, a detector of clathrin-coated vesicle budding. *Structure* **18**, 1191-  
712 1198, doi:10.1016/j.str.2010.06.016 (2010).
- 713 8 Dymont, D. A. *et al.* Homozygous nonsense mutation in SYNJ1 associated with  
714 intractable epilepsy and tau pathology. *Neurobiology of aging* **36**, 1222 e1221-1225,  
715 doi:10.1016/j.neurobiolaging.2014.09.005 (2015).
- 716 9 Cremona, O. *et al.* Essential role of phosphoinositide metabolism in synaptic vesicle  
717 recycling. *Cell* **99**, 179-188, doi:S0092-8674(00)81649-9 [pii] (1999).
- 718 10 Kurian, M. A. & Abela, L. in *GeneReviews((R))* (eds M. P. Adam *et al.*) (1993).
- 719 11 Ng, J. *et al.* DNAJC6 Mutations Disrupt Dopamine Homeostasis in Juvenile  
720 Parkinsonism-Dystonia. *Mov Disord* **35**, 1357-1368, doi:10.1002/mds.28063 (2020).
- 721 12 Lesage, S. *et al.* Clinical Variability of SYNJ1-Associated Early-Onset Parkinsonism.  
722 *Front Neurol* **12**, 648457, doi:10.3389/fneur.2021.648457 (2021).
- 723 13 Cao, M. *et al.* Parkinson Sac Domain Mutation in Synaptojanin 1 Impairs Clathrin  
724 Uncoating at Synapses and Triggers Dystrophic Changes in Dopaminergic Axons.  
725 *Neuron* **93**, 882-896 e885, doi:10.1016/j.neuron.2017.01.019 (2017).
- 726 14 Yang, S. *et al.* Presynaptic autophagy is coupled to the synaptic vesicle cycle via  
727 ATG-9. *Neuron*, doi:10.1016/j.neuron.2021.12.031 (2022).
- 728 15 Vanhauwaert, R. *et al.* The SAC1 domain in synaptojanin is required for  
729 autophagosome maturation at presynaptic terminals. *EMBO J* **36**, 1392-1411,  
730 doi:10.15252/embj.201695773 (2017).
- 731 16 Pan, P. Y. *et al.* Synj1 haploinsufficiency causes dopamine neuron vulnerability and  
732 alpha-synuclein accumulation in mice. *Hum Mol Genet* **29**, 2300-2312,  
733 doi:10.1093/hmg/ddaa080 (2020).
- 734 17 Cao, M., Park, D., Wu, Y. & De Camilli, P. Absence of Sac2/INPP5F enhances the  
735 phenotype of a Parkinson's disease mutation of synaptojanin 1. *Proc Natl Acad Sci U*  
736 *S A* **117**, 12428-12434, doi:10.1073/pnas.2004335117 (2020).
- 737 18 Song, L. *et al.* Auxilin Underlies Progressive Locomotor Deficits and Dopaminergic  
738 Neuron Loss in a Drosophila Model of Parkinson's Disease. *Cell Rep* **18**, 1132-1143,  
739 doi:10.1016/j.celrep.2017.01.005 (2017).
- 740 19 Yim, Y. I. *et al.* Endocytosis and clathrin-uncoating defects at synapses of auxilin  
741 knockout mice. *Proc Natl Acad Sci U S A* **107**, 4412-4417,  
742 doi:10.1073/pnas.1000738107 (2010).
- 743 20 Roosen, D. A. *et al.* Mutations in Auxilin cause parkinsonism via impaired clathrin-  
744 mediated trafficking at the Golgi apparatus and synapse. *bioRxiv*, 830802,  
745 doi:10.1101/830802 (2021).



- 746 21 Wulansari, N. *et al.* Neurodevelopmental defects and neurodegenerative phenotypes  
747 in human brain organoids carrying Parkinson's disease-linked DNAJC6 mutations.  
748 *Sci Adv* **7**, doi:10.1126/sciadv.abb1540 (2021).
- 749 22 Vezzani, A. & Sperk, G. Overexpression of NPY and Y2 receptors in epileptic brain  
750 tissue: an endogenous neuroprotective mechanism in temporal lobe epilepsy?  
751 *Neuropeptides* **38**, 245-252, doi:10.1016/j.npep.2004.05.004 (2004).
- 752 23 Nadler, J. V., Tu, B., Timofeeva, O., Jiao, Y. & Herzog, H. Neuropeptide Y in the  
753 recurrent mossy fiber pathway. *Peptides* **28**, 357-364,  
754 doi:10.1016/j.peptides.2006.07.026 (2007).
- 755 24 Dunn, A. R. *et al.* Synaptic vesicle glycoprotein 2C (SV2C) modulates dopamine  
756 release and is disrupted in Parkinson disease. *Proc Natl Acad Sci U S A* **114**, E2253-  
757 E2262, doi:10.1073/pnas.1616892114 (2017).
- 758 25 Janz, R. & Sudhof, T. C. SV2C is a synaptic vesicle protein with an unusually  
759 restricted localization: anatomy of a synaptic vesicle protein family. *Neuroscience* **94**,  
760 1279-1290, doi:10.1016/s0306-4522(99)00370-x (1999).
- 761 26 Foo, J. N. *et al.* Identification of Risk Loci for Parkinson Disease in Asians and  
762 Comparison of Risk Between Asians and Europeans: A Genome-Wide Association  
763 Study. *JAMA Neurol* **77**, 746-754, doi:10.1001/jamaneurol.2020.0428 (2020).
- 764 27 Grover, S. *et al.* Replication of a Novel Parkinson's Locus in a European Ancestry  
765 Population. *Mov Disord* **36**, 1689-1695, doi:10.1002/mds.28546 (2021).
- 766 28 Nalls, M. A. *et al.* Large-scale meta-analysis of genome-wide association data  
767 identifies six new risk loci for Parkinson's disease. *Nat Genet* **46**, 989-993,  
768 doi:10.1038/ng.3043 (2014).
- 769 29 Luthi, A. *et al.* Synaptotagmin 1 contributes to maintaining the stability of GABAergic  
770 transmission in primary cultures of cortical neurons. *J Neurosci* **21**, 9101-9111  
771 (2001).
- 772 30 Hayashi, M. *et al.* Cell- and stimulus-dependent heterogeneity of synaptic vesicle  
773 endocytic recycling mechanisms revealed by studies of dynamin 1-null neurons. *Proc*  
774 *Natl Acad Sci U S A* **105**, 2175-2180, doi:10.1073/pnas.0712171105 (2008).
- 775 31 Picillo, M., Ranieri, A., Orefice, G., Bonifati, V. & Barone, P. Clinical progression of  
776 SYNJ1-related early onset atypical parkinsonism: 3-year follow up of the original  
777 Italian family. *J Neurol* **261**, 823-824, doi:10.1007/s00415-014-7270-6 (2014).
- 778 32 Li, J., Kim, S., Pappas, S. S. & Dauer, W. T. CNS critical periods: implications for  
779 dystonia and other neurodevelopmental disorders. *JCI Insight* **6**,  
780 doi:10.1172/jci.insight.142483 (2021).
- 781 33 Keber, U. *et al.* Striatal tyrosine hydroxylase-positive neurons are associated with L-  
782 DOPA-induced dyskinesia in hemiparkinsonian mice. *Neuroscience* **298**, 302-317,  
783 doi:10.1016/j.neuroscience.2015.04.021 (2015).
- 784 34 Betarbet, R. *et al.* Dopaminergic neurons intrinsic to the primate striatum. *J Neurosci*  
785 **17**, 6761-6768 (1997).
- 786 35 Doucet-Beaupre, H. *et al.* Lmx1a and Lmx1b regulate mitochondrial functions and  
787 survival of adult midbrain dopaminergic neurons. *Proc Natl Acad Sci U S A* **113**,  
788 E4387-4396, doi:10.1073/pnas.1520387113 (2016).
- 789 36 Xenias, H. S., Ibanez-Sandoval, O., Koos, T. & Tepper, J. M. Are striatal tyrosine  
790 hydroxylase interneurons dopaminergic? *J Neurosci* **35**, 6584-6599,  
791 doi:10.1523/JNEUROSCI.0195-15.2015 (2015).
- 792 37 Dunn, A. R. *et al.* Immunohistochemical analysis of the expression of SV2C in mouse,  
793 macaque and human brain. *Brain Res* **1702**, 85-95,  
794 doi:10.1016/j.brainres.2017.12.029 (2019).
- 795 38 Dardou, D. *et al.* Distribution of SV2C mRNA and protein expression in the mouse  
796 brain with a particular emphasis on the basal ganglia system. *Brain Res* **1367**, 130-  
797 145, doi:10.1016/j.brainres.2010.09.063 (2011).
- 798 39 Dardou, D. *et al.* A role for Sv2c in basal ganglia functions. *Brain Res* **1507**, 61-73,  
799 doi:10.1016/j.brainres.2013.02.041 (2013).



- 800 40 Tanimura, A. *et al.* Striatal cholinergic interneurons and Parkinson's disease. *Eur J*  
801 *Neurosci* **47**, 1148-1158, doi:10.1111/ejn.13638 (2018).
- 802 41 Hill-Burns, E. M. *et al.* A genetic basis for the variable effect of smoking/nicotine on  
803 Parkinson's disease. *Pharmacogenomics J* **13**, 530-537, doi:10.1038/tpj.2012.38  
804 (2013).
- 805 42 Ferguson, S. M. *et al.* A selective activity-dependent requirement for dynamin 1 in  
806 synaptic vesicle endocytosis. *Science* **316**, 570-574, doi:10.1126/science.1140621  
807 (2007).
- 808 43 Bolte, S. & Cordelieres, F. P. A guided tour into subcellular colocalization analysis in  
809 light microscopy. *J Microsc* **224**, 213-232, doi:10.1111/j.1365-2818.2006.01706.x  
810 (2006).
- 811 44 Tokuyasu, K. T. A technique for ultracryotomy of cell suspensions and tissues. *J Cell*  
812 *Biol* **57**, 551-565, doi:10.1083/jcb.57.2.551 (1973).  
813

814 **Figure Legends**

815 **Figure 1. Aux-KO mice exhibit parkinsonism-like phenotypes with dystrophic DAergic**  
816 **axon terminals in the dorsal striatum.**

817 (A) Hindlimb clasping phenotype of 4-month-old Aux-KO mouse.

818 (B) 2-month-old Aux-KO mice have missteps while walking on the balance beam.

819 (C) Quantification for the number of missteps during the balance beam test for three age  
820 groups of Aux-KO mice. Aux-KO mice only exhibit mild fine motor deficits at 2-4 months  
821 compared to the Ctrl group. Data are represented as mean  $\pm$  SEM (\*\*  $p < 0.01$ , by Student's  
822 unpaired  $t$  test). N numbers for the Ctrl (2-4M: 15, 5-8M: 7 and >9M: 8) and Aux-KO mice (2-  
823 4M: 14, 5-8M: 8 and >9M: 13).

824 (D) Performance of three age groups of Aux-KO mice on the accelerated rotarod. Data are  
825 represented as mean  $\pm$  SEM. N numbers used for each age group of the Ctrl and Aux-KO  
826 mice (2-4M: 15 and 13; 5-8M: 9 and 11; >9M: 11 and 15).

827 (E) Double staining for TH and DAT of 1-month-old Ctrl and Aux-KO mice shows selective  
828 clustering of these two DAergic markers only in the dorsal striatum.

829 (F) Mander's colocalization coefficient showed that TH and DAT clusters which are only found  
830 in the dorsal striatum (DS) colocalizes very well with each other. Data are represented as  
831 mean  $\pm$  SEM (\*\*  $p < 0.01$ , by unpaired  $t$  test). N = 3 mice for each genotype.

832 (G and I) Age-dependent decrease of the number of TH/DAT-positive clusters in the dorsal  
833 striatum of Aux-KO and SJ1-KI<sup>RQ</sup> mice is observed respectively at both 5-month and 12-month.

834 (H and J) Quantification for TH and DAT clusters shown in (G) and (I). The number of clusters  
835 is counted in five randomly selected, 300 x 300- $\mu$ m regions of interest (ROIs). Data are  
836 represented as mean  $\pm$  SEM (\*\*  $p < 0.01$ , and \*\*\*  $p < 0.001$ , and \*\*\*\*  $p < 0.0001$  by two-way  
837 ANOVA with post-hoc Tukey's test). n = 3 mice for each genotype and each age group.

838

839 **Figure 2. LOF of both Auxilin and SJ1 exacerbate neurological defects in Aux-KO/SJ1-**  
840 **KI<sup>RQ</sup> mice.**

841 (A) Schematic diagram displaying the role of Auxilin (PARK19) and SJ1 (PARK20) in clathrin-  
842 mediated SVs recycling.

843 (B) Survival curves of wild-type (WT), Aux-KO, SJ1-KI<sup>RQ</sup>, and Aux-KO/SJ1-KI<sup>RQ</sup> mice.

844 (C) Representative images of immunoreactivity for CLC, AP2, SJ1, Amphiphysin 2 and  
845 Amphiphysin 1 in DIV19 cultured primary cortical neurons from Ctrl, Aux-KO, SJ1-KI<sup>RQ</sup> and  
846 Aux-KO/SJ1-KI<sup>RQ</sup> newborn pups.

847 (D) Quantification of synaptic clusters intensity shown in (C). Data are represented as mean  
848  $\pm$  SEM (\*  $p < 0.05$ , \*\*  $p < 0.01$ , \*\*\*  $p < 0.001$ , \*\*\*\*  $p < 0.0001$  by one-way ANOVA with post-hoc  
849 Tukey's test). The number of neurons quantified for each endocytic marker is as follow: Ctrl:  
850  $n = 43-49$ , Aux-KO:  $n = 32-52$ , SJ1-KI<sup>RQ</sup>:  $n = 35-37$ , Aux-KO/SJ1-KI<sup>RQ</sup>:  $n = 39-44$  cultured from 4-6  
851 mice.

852 (E) Immunostaining of amphiphysin 1 with Gad65 (inhibitory presynaptic marker) in DIV19  
853 cortical neurons revealed that these synaptic clustering of endocytic proteins occur  
854 predominantly in GABAergic neurons.

855 (F) Mander's coefficient shows that both single mutants (Aux-KO and SJ1-KI<sup>RQ</sup>) and double  
856 mutant Aux-KO/SJ1-KI<sup>RQ</sup> have better colocalization of Amph1 and Gad65 clusters compared  
857 to control. Data are represented as mean  $\pm$  SEM (\*  $p < 0.05$ , \*\*\*  $p < 0.001$ ; \*\*\*\*  $p < 0.0001$  by one-  
858 way ANOVA with post-hoc Tukey's test).  $N = 8-10$  neurons.

859

860 **Figure 3. Accumulation of CCVs and empty clathrin cages in nerve terminals of Aux-**  
861 **KO, SJ1-KI<sup>RQ</sup>, and Aux-KO/SJ1-KI<sup>RQ</sup> mice.**

862 (A) Representative EM micrographs of nerve terminals from the dorsal striatum of single and  
863 double mutant mice. Red and black arrows point to CCVs and empty clathrin coated cages  
864 (EC) respectively. Scale bar: 250 nm.

865 (B) Morphometry analysis of the number of SVs, sum of number of CCVs and ECs, CCVs, as  
866 well as ECs per pre-synaptic area in the dorsal striatum (Ctrl  $n = 124$ , Aux-KO  $n = 156$ , SJ1-KI<sup>RQ</sup>  
867  $n = 198$ , and Aux-KO/SJ1-KI<sup>RQ</sup>  $n = 120$ ). Each dot represents one nerve terminal. Data are

868 represented as mean  $\pm$  SEM. \*  $p < 0.05$ , \*\*  $p < 0.01$ , \*\*\*\*  $p < 0.0001$  (One-way ANOVA with  
869 Games-Howell's multiple comparison test).

870 (C) Examples of Purkinje nerve terminals in the deep cerebellar nuclei of Aux-KO/SJ1-KI<sup>RQ</sup>  
871 mouse showing the striking accumulation of assembled clathrin (both ECs and CCVs). The  
872 tight packaging of SVs (middle and right images) was previously reported in nerve terminals  
873 of SJ1-KI<sup>RQ</sup> mice (<sup>13</sup> Fig. S3D) and may reflect dystrophic changes, Scale bar: 500 nm.

874

875 **Figure 4. DAergic axon terminals undergo dystrophic changes in both dorsal and**  
876 **ventral striatum of Aux-KO/SJ1-KI<sup>RQ</sup> mice.**

877 (A and C) Representative images for TH and DAT in cryopreserved-sections for 4 genotypes  
878 in (A) dorsal striatum and (C) nucleus accumbens (NAc) which is part of the ventral striatum.

879 (B and D) Quantification of colocalization of TH and DAT clusters using Mander's coefficient  
880 for (B) dorsal striatum, DS and (D) ventral striatum, VS. Data are represented as mean  $\pm$  SEM  
881 (\*\*  $p < 0.01$ , \*\*\*  $p < 0.001$  by one-way ANOVA with post-hoc Tukey's test). N= 3-4 mice per  
882 genotype.

883 (E-F) Quantification for the average number of DAT and TH clusters above  $5\mu\text{m}^2$  in (E) dorsal  
884 striatum and (F) ventral striatum of 1-2 months old mice. The number of clusters is calculated  
885 in five regions of interest (ROIs) which were selected at random for quantification of each  
886 mouse. Data are represented as mean  $\pm$  SEM (\*  $p < 0.05$ , \*\*  $p < 0.01$ , \*\*\*  $p < 0.001$ , \*\*\*\*  $p < 0.0001$   
887 by two-way ANOVA with post-hoc Tukey's test). N = 3-4 mice for each genotype.

888

889 **Figure 5. EM micrographs showing multilayered onion-like membrane structures in the**  
890 **dorsal striatum of Aux-KO, SJ1-KI<sup>RQ</sup>, and Aux-KO/SJ1-KI<sup>RQ</sup> mice.**

891 These structures, which are positive for TH immunoreactivity (see Supplementary Fig 6),  
892 appear to result from invaginations of the plasma membrane as indicated by red arrowheads.

893 Note in the bottom right field presence of a cluster of SVs (black arrowheads) and scattered  
894 CCVs (red arrows) and empty clathrin cages (black arrows), confirming that these structures  
895 represent dystrophic changes of nerve terminals. Scale bar: 500 nm.

896

897 **Figure 6. Accumulation of other proteins with TH/DAT in dystrophic DAergic nerve**  
898 **terminals in 1-month-old Aux-KO/SJ1-KI<sup>RQ</sup> mice.**

899 (A) Double staining of DAT with AADC, a DA catabolism enzyme showed colocalization in  
900 the striatum of Aux-KO/SJ1-KI<sup>RQ</sup> mice.

901 (B) Double staining of DAT with SNAP25, a plasma membrane SNARE protein showed  
902 colocalization in the striatum of Aux-KO/SJ1-KI<sup>RQ</sup> mice.

903 (C-D) Double staining of SV2C (C) and SV2B (D) reveals that SV2C is specifically  
904 accumulated in TH/DAT-positive clusters in the striatum of Aux-KO/SJ1-KI<sup>RQ</sup> mice, but not its  
905 family member SV2B.

906 (E-F) Double staining of clathrin light chain (E) and endophilin (F) reveals that both endocytic  
907 proteins do not colocalize with TH/DAT-positive clusters in the striatum of Aux-KO/SJ1-KI<sup>RQ</sup>  
908 mice.

909 (G) Mander's colocalization coefficient shows that AADC and SV2C colocalize the best with  
910 DAT/TH clusters, followed by SNAP25. SV2B, CLC and Endo1 do not colocalize with the DAT  
911 clusters. Data are represented as mean  $\pm$  SEM. N = 5-11 random sampling sites.

912 (H) Aux-KO/SJ1-KI<sup>RQ</sup> shows 50% reduction in striatal DA levels measured using HPLC. Data  
913 are represented as mean  $\pm$  SEM (\*  $p < 0.05$ , \*\*  $p < 0.01$  by one-way ANOVA with post-hoc  
914 Tukey's test). N = 7 mice for each genotype.

915

916 **Figure 7. Adaptive changes of TH-positive interneurons and SV2C-positive cholinergic**  
917 **interneurons in Aux-KO/SJ1-KI<sup>RQ</sup> striatum.**

918 (A) Immunostaining of TH reveals the Aux-KO/SJ1-KI<sup>RQ</sup> striatum contains a large number of  
919 THINs. THINs are not found in Ctrl and Aux-KO striatum; and are less often found in SJ1-KI<sup>RQ</sup>  
920 striatum.

921 (B) Quantification for the number of THINs in 10 randomly selected regions of interest (ROIs)  
922 from a representative coronal section of the striatum. Data are represented as mean  $\pm$  SEM  
923 (\*\*  $p < 0.01$  by one-way ANOVA with post-hoc Tukey's test). N = 3-4 mice for each genotype.

924 (C) Immunostaining of TH (green) and DAT (red) reveals presence of TH-positive/DAT-  
925 negative neurons in the 1-month-old Aux-KO/SJ1-KI<sup>RQ</sup> striatum.

926 (D) THINs also show immunoreactivity towards anti-AADC antibody.

927 (E) Representative images of SV2C and TH staining in the dorsal striatum of 1-month-old Aux-  
928 KO/SJ1-KI<sup>RQ</sup> mice. TH and SV2C were observed to be expressed in separate neuron  
929 populations. SV2C-positive/TH-negative neurons are marked by white arrows.

930 (F) Double staining of striatal region with cholinergic marker ChAT and SV2C shows overlap  
931 between the two in a specific neuronal subset, indicating that the SV2C-positive neurons are  
932 giant striatal ChINs.

933 (G) The cell bodies of THINs and ChINs are selected as our region of interest to perform  
934 Pearson's correlation coefficient. This demonstrate the two different types of interneurons:  
935 THINs where TH and AADC colocalizes well but not with DAT; ChINs where SV2C colocalizes  
936 well with ChAT but not with TH. Data are represented as mean  $\pm$  SEM. N = 7-10 random  
937 sampling site.

938 (H) Striatal IHC for single coronal section reveals subset of ChAT-positive ChINs that exhibit  
939 striking upregulation of SV2C in Aux-KO/SJ1-KI<sup>RQ</sup> mice compared to control.

940 (I) Quantification for percentage of ChAT-positive interneurons expressing SV2C, as well as  
941 individual intensity of SV2C and ChAT in striatal ChINs. For each individual mouse, 20 ChINs  
942 across a single coronal section of striatum were randomly selected for quantification. Data is  
943 represented as mean  $\pm$  SEM (\*  $p < 0.05$  and \*\*  $p < 0.01$ , by Student's unpaired  $t$  test). Ctrl: n=5  
944 mice and Aux-KO/SJ1-KI<sup>RQ</sup>: n=5 mice.

945

946

947 **Supplementary Figure Legends**

948

949 **Supplementary Figure 1. Aux-KO/SJ1-KI<sup>RQ</sup> mice are smaller in size and has more severe**

950 **DAergic phenotype at 7-month-old.**

951 (A-B) Image of the size of P25 Aux-KO/SJ1-KI<sup>RQ</sup> mice comparing with its littermate single  
952 mutants; (A) Aux-KO and (B) SJ1-KI<sup>RQ</sup>.

953 (C) Immunostaining of NPY shows elevated expression of NPY in the dentate gyrus of Aux-  
954 KO/SJ1-KI<sup>RQ</sup> mice.

955 (D) Quantification of fluorescence intensity of NPY staining shown in (C). Data are represented  
956 as mean  $\pm$  SEM (\*  $p < 0.05$  by one-way ANOVA with post-hoc Tukey's test). N = 3 mice for  
957 each genotype.

958 (E) Representative images for double immunofluorescence of TH/DAT, AADC/DAT and  
959 SV2C/DAT for all 4 genotypes at 7-month-old. The only Aux-KO/SJ1-KI<sup>RQ</sup> that managed to  
960 survive till this age showed increased number of clusters, THINs and ChINs compared to the  
961 other 3 genotypes.

962

963 **Supplementary Figure 2. Aux-KO/SJ1-KI<sup>RQ</sup> mice have normal brain development and**  
964 **architecture.**

965 H&E staining reveals absence of gross structural abnormality in various regions (cortex,  
966 hippocampus, striatum and cerebellum) of 1-month-old SJ1-KI<sup>RQ</sup>, Aux-KO and Aux-KO/SJ1-  
967 KI<sup>RQ</sup> mice brain.

968

969 **Supplementary Figure 3. Absence of gliosis in Aux-KO/SJ1-KI<sup>RQ</sup> brain.**

970 (A and B) No obvious difference in immunostaining intensity of (A) Iba1-microglia marker and  
971 (B) GFAP-astrocytes marker in different regions of 1-month-old Ctrl, SJ1-KI<sup>RQ</sup>, Aux-KO and  
972 Aux-KO/SJ1-KI<sup>RQ</sup> mice brain.

973

974 **Supplementary Figure 4. Western blot analysis of endocytic proteins, synaptic proteins,**  
975 **DAergic markers and PD-related proteins in mouse brains.**

976 (A) Representative blots for various proteins involved in PD and synaptic endocytosis from 1-  
977 month-old control, SJ1-KI<sup>RQ</sup>, Aux-KO and Aux-KO/SJ1-KI<sup>RQ</sup> whole brain homogenates.

978 (B) Quantification of expression levels of the proteins shown in (A). Protein levels were  
979 normalized to the level of Actin. Data are represented as mean  $\pm$  SEM (one-way ANOVA with  
980 post-hoc Tukey's test). N = 3-4 mice for each genotype.

981

982 **Supplementary Figure 5. Presence of dystrophic changes only in the axon terminals of**  
983 **DAergic neurons but not the cell bodies of Aux-KO/SJ1-KI<sup>RQ</sup> mice.**

984 (A) Double staining of anti-TH and anti-AADC showed normal morphology of DAergic neuron  
985 cell bodies and dendrites in the midbrain.

986 (B) Stereological analysis of TH-positive cell bodies in the SN and VTA region of control and  
987 Aux-KO/SJ1-KI<sup>RQ</sup> mice at 1 month old. The estimated cell numbers in one hemisphere is  
988 shown. Data are represented as mean  $\pm$  SEM (Student's unpaired t-test). n=7 mice for control  
989 whereas n=6 mice for Aux-KO/SJ1-KI<sup>RQ</sup>.

990 (C) AADC (green) and DAT (red) immunostaining reveals the presence of AADC/DAT-positive  
991 aggregates in the olfactory tubercle (OT, part of ventral striatum) of Aux-KO/SJ1-KI<sup>RQ</sup> mice.

992

993 **Supplementary figure 6. Overview of cluster distribution in the striatum of Aux-KO, SJ1-**  
994 **KI<sup>RQ</sup> and Aux-KO/SJ1-KI<sup>RQ</sup> mice.**

995 Tiling of a single coronal striatum section immunostained for DAT. White dotted line separates  
996 the dorsal and ventral striatum of the mice. Insets on the bottom left corner of the image  
997 showed high magnification images of the clusters for dorsal (pink, top) and ventral (purple,  
998 bottom) striatum for each genotype. Note the absence of clusters in the ventral striatum in all  
999 mice except the Aux-KO/SJ1-KI<sup>RQ</sup> mice. Bottom right inset of the Aux-KO tiling image depicts  
1000 the dorsal (pink) and ventral (purple) mouse striatum.

1001



1002 **Supplementary figure 7. EM immunogold labelling of onion-like membrane structure in**  
1003 **dorsal striatum of Aux-KO/SJ1-KI<sup>RQ</sup> mice.**

1004 (A) Anti-TH immunogold labelling (10 nm gold particles) of an ultrathin frozen sections of  
1005 Aux-KO/SJ1-KI<sup>RQ</sup> dorsal striatum. The multilayered membrane structures are positive for TH  
1006 immunoreactivity (boxed in white box). Scale bar: 1  $\mu$ m

1007 (B) The onion-like membrane structures boxed in white in (A) is enlarged and shown here.  
1008 Scale bar: 250 nm

1009

1010 **Supplementary figure 8. Various other markers examined with TH/DAT-positive clusters.**

1011 (A-B) Representative images for immunoreactivity of anti-DAT or TH with (A) anti-AADC and  
1012 (B) anti-SV2C in Aux-KO and SJ1-KI<sup>RQ</sup> mice.

1013 (C) Immunostaining of DAT with Syt1 showed partial colocalization in Aux-KO/SJ1-KI<sup>RQ</sup>  
1014 double mutant striatum.

1015 (D-G) Double immunofluorescence of synapsin, GFAP, Iba1 and Darpp32 with TH/DAT  
1016 showed no colocalization in the striatum of Aux-KO/SJ1-KI<sup>RQ</sup> mice.

1017

1018 **Supplementary figure 9. Immunofluorescence analysis of SNAP25 in different brain**  
1019 **regions.**

1020 (A) Immunostaining of SNAP25 (green) showed partial colocalization with DAT-positive  
1021 clusters (red) in the striatum of Aux-KO, SJ1-KI<sup>RQ</sup> and Aux-KO/SJ1-KI<sup>RQ</sup> mice.

1022 (B) Immunoreactivity of anti-SNAP25 in the cortex of WT, Aux-KO, SJ1-KI<sup>RQ</sup> and Aux-KO/SJ1-  
1023 KI<sup>RQ</sup> mice. No clusters of SNAP25 were observed in the cortex.

1024

1025 **Supplementary figure 10. Properties of striatal THINs and CHINs in the striatum of Aux-**  
1026 **KO/SJ1-KI<sup>RQ</sup> mice.**

1027 (A) Immunoreactivity of anti-TH with anti-Darpp32 showed that THINs is a distinct group of  
1028 neurons from Darpp32-positive MSNs.

1029 (B) Double staining of anti-TH and anti-GABA showed that THINs are GABAergic striatal  
1030 interneurons.

1031 (C-D) Immunostaining of SV2C using a different anti-SV2C antibody (host species: Rabbit)  
1032 labelled the same structures: (c) ChAT-positive ChINs and (d) SV2C/DAT-positive clusters in  
1033 Aux-KO/SJ1-KI<sup>RQ</sup>.

1034 (E-F) A large microscope field of view showed the distribution of (e) SV2C-positive and (f)  
1035 ChAT-positive interneurons in the striatum of WT and Aux-KO/SJ1-KI<sup>RQ</sup> mice.

1036

### 1037 **Supplementary Video Legends**

1038 **Supplementary Video 1 Tonic-clonic epileptic seizures in a 5-month-old Aux-KO mouse.**

1039 **Supplementary Video 2 Balance beam test in 2-month-old (A) Ctrl and (B) Aux-KO mice.**

1040 **Supplementary Video 3 Balance beam test in 4-month-old (A) Ctrl, (B) Aux-KO/SJ1-**

1041 **WT, (C) Aux-Ht/SJ1-KI<sup>RQ</sup> and (D) Aux-KO/SJ1-KI<sup>RQ</sup> mice.** This 4-month-old Aux-KO/SJ1-

1042 KI<sup>RQ</sup> mouse is the same mouse that managed to survive till 7-month-old.

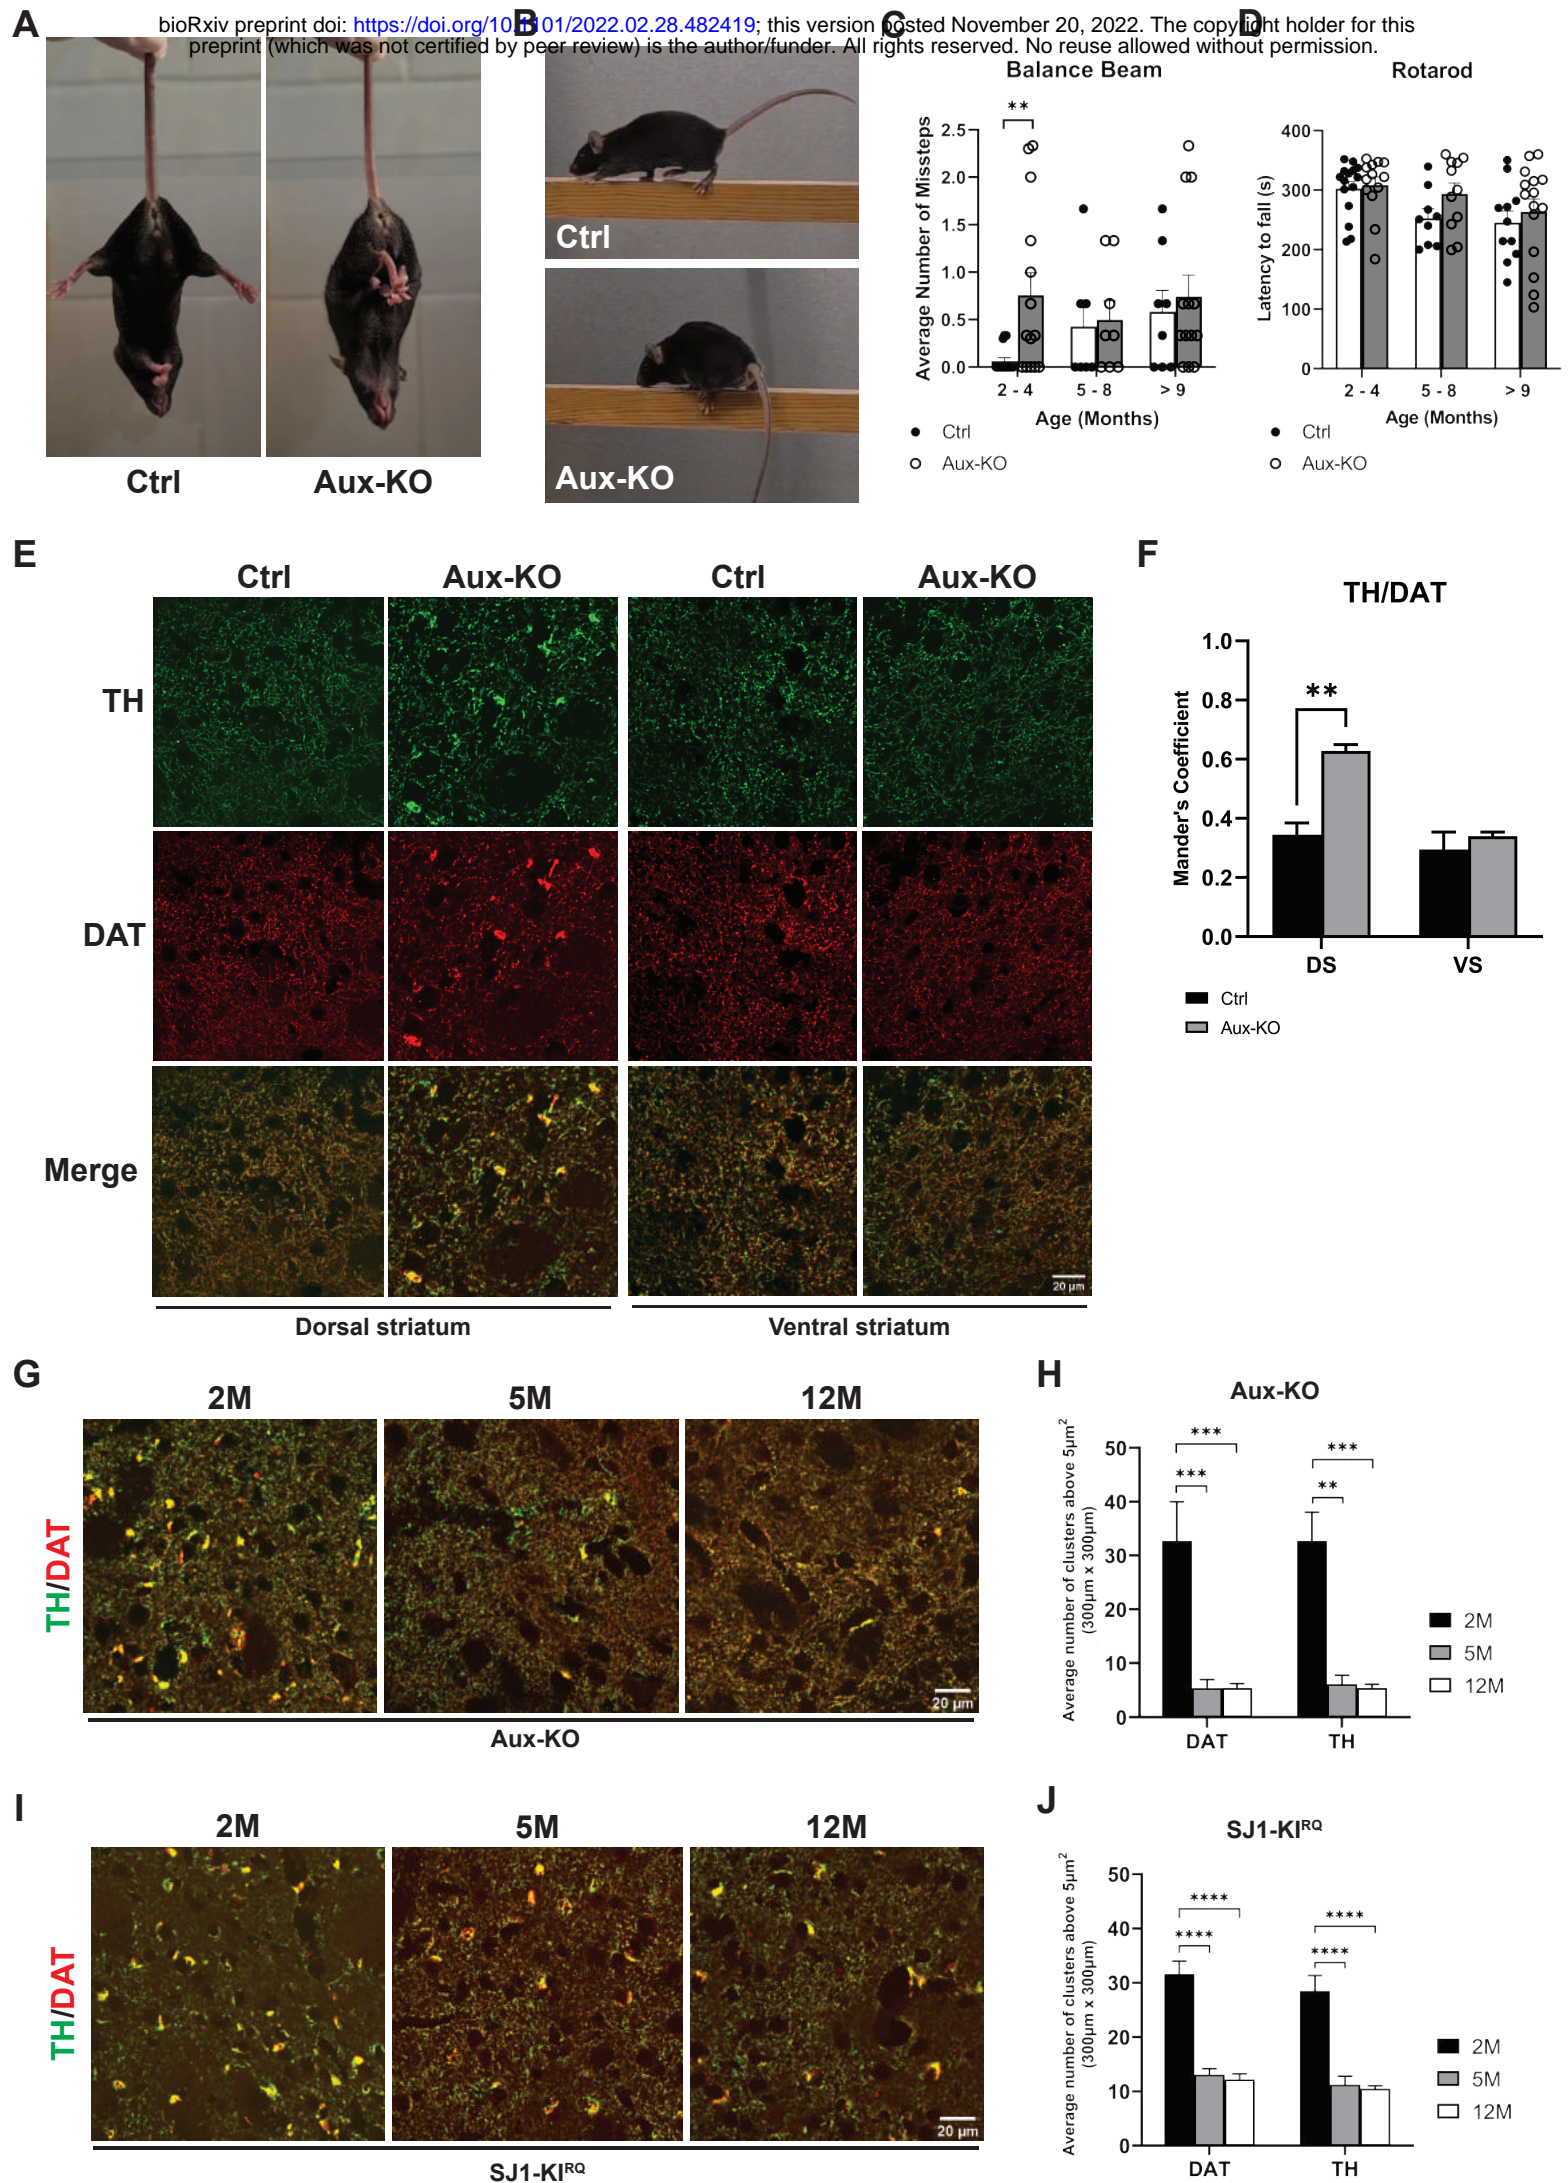

Fig 1



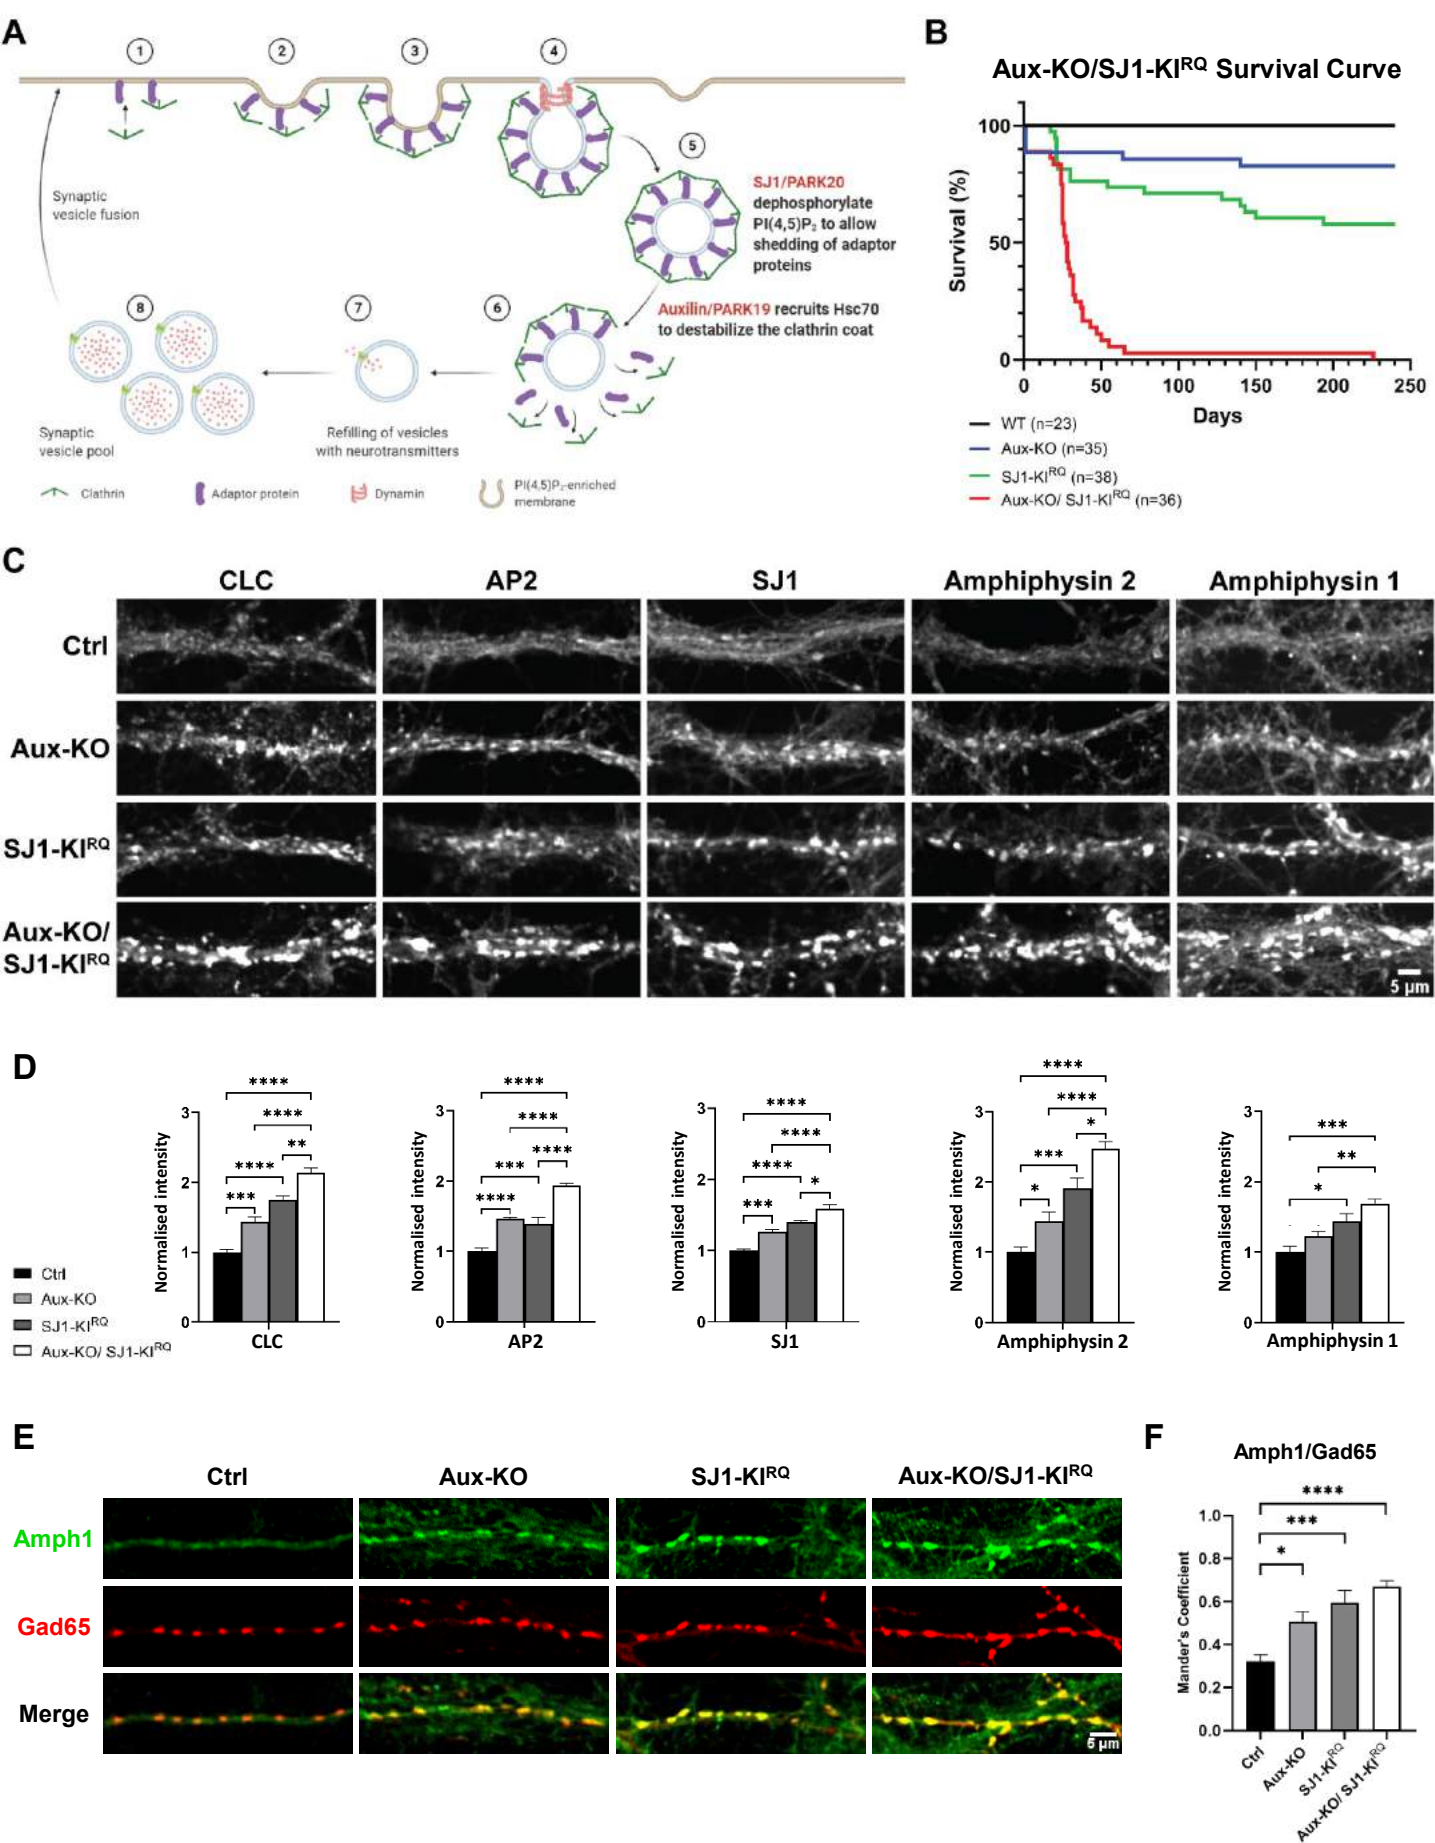

**Fig 2**

**A**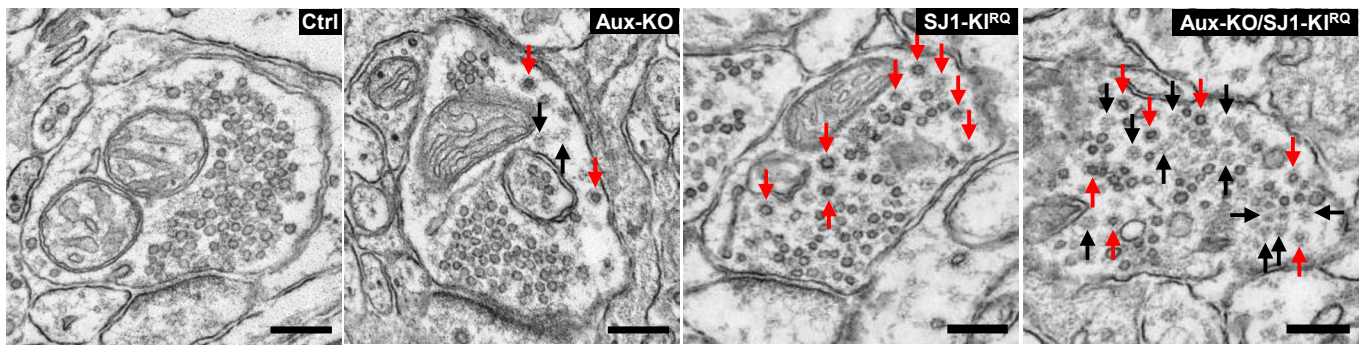**B**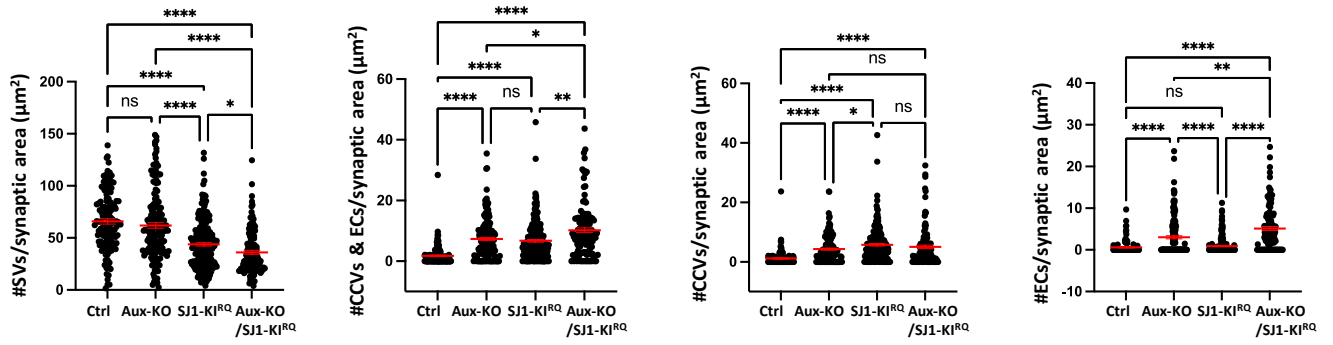**C**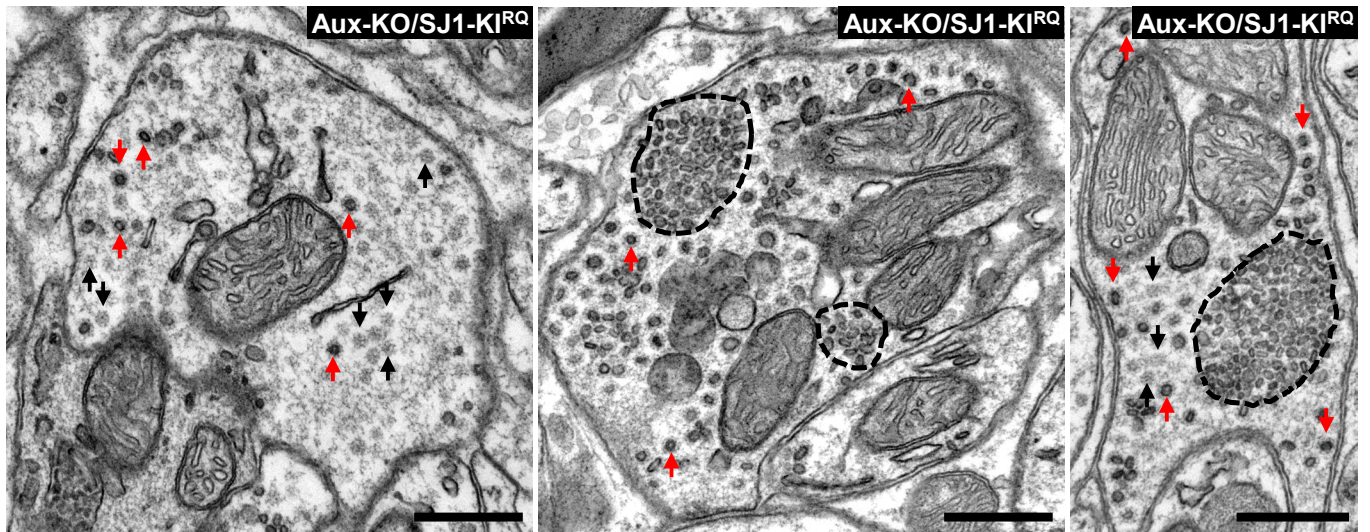**Fig 3**



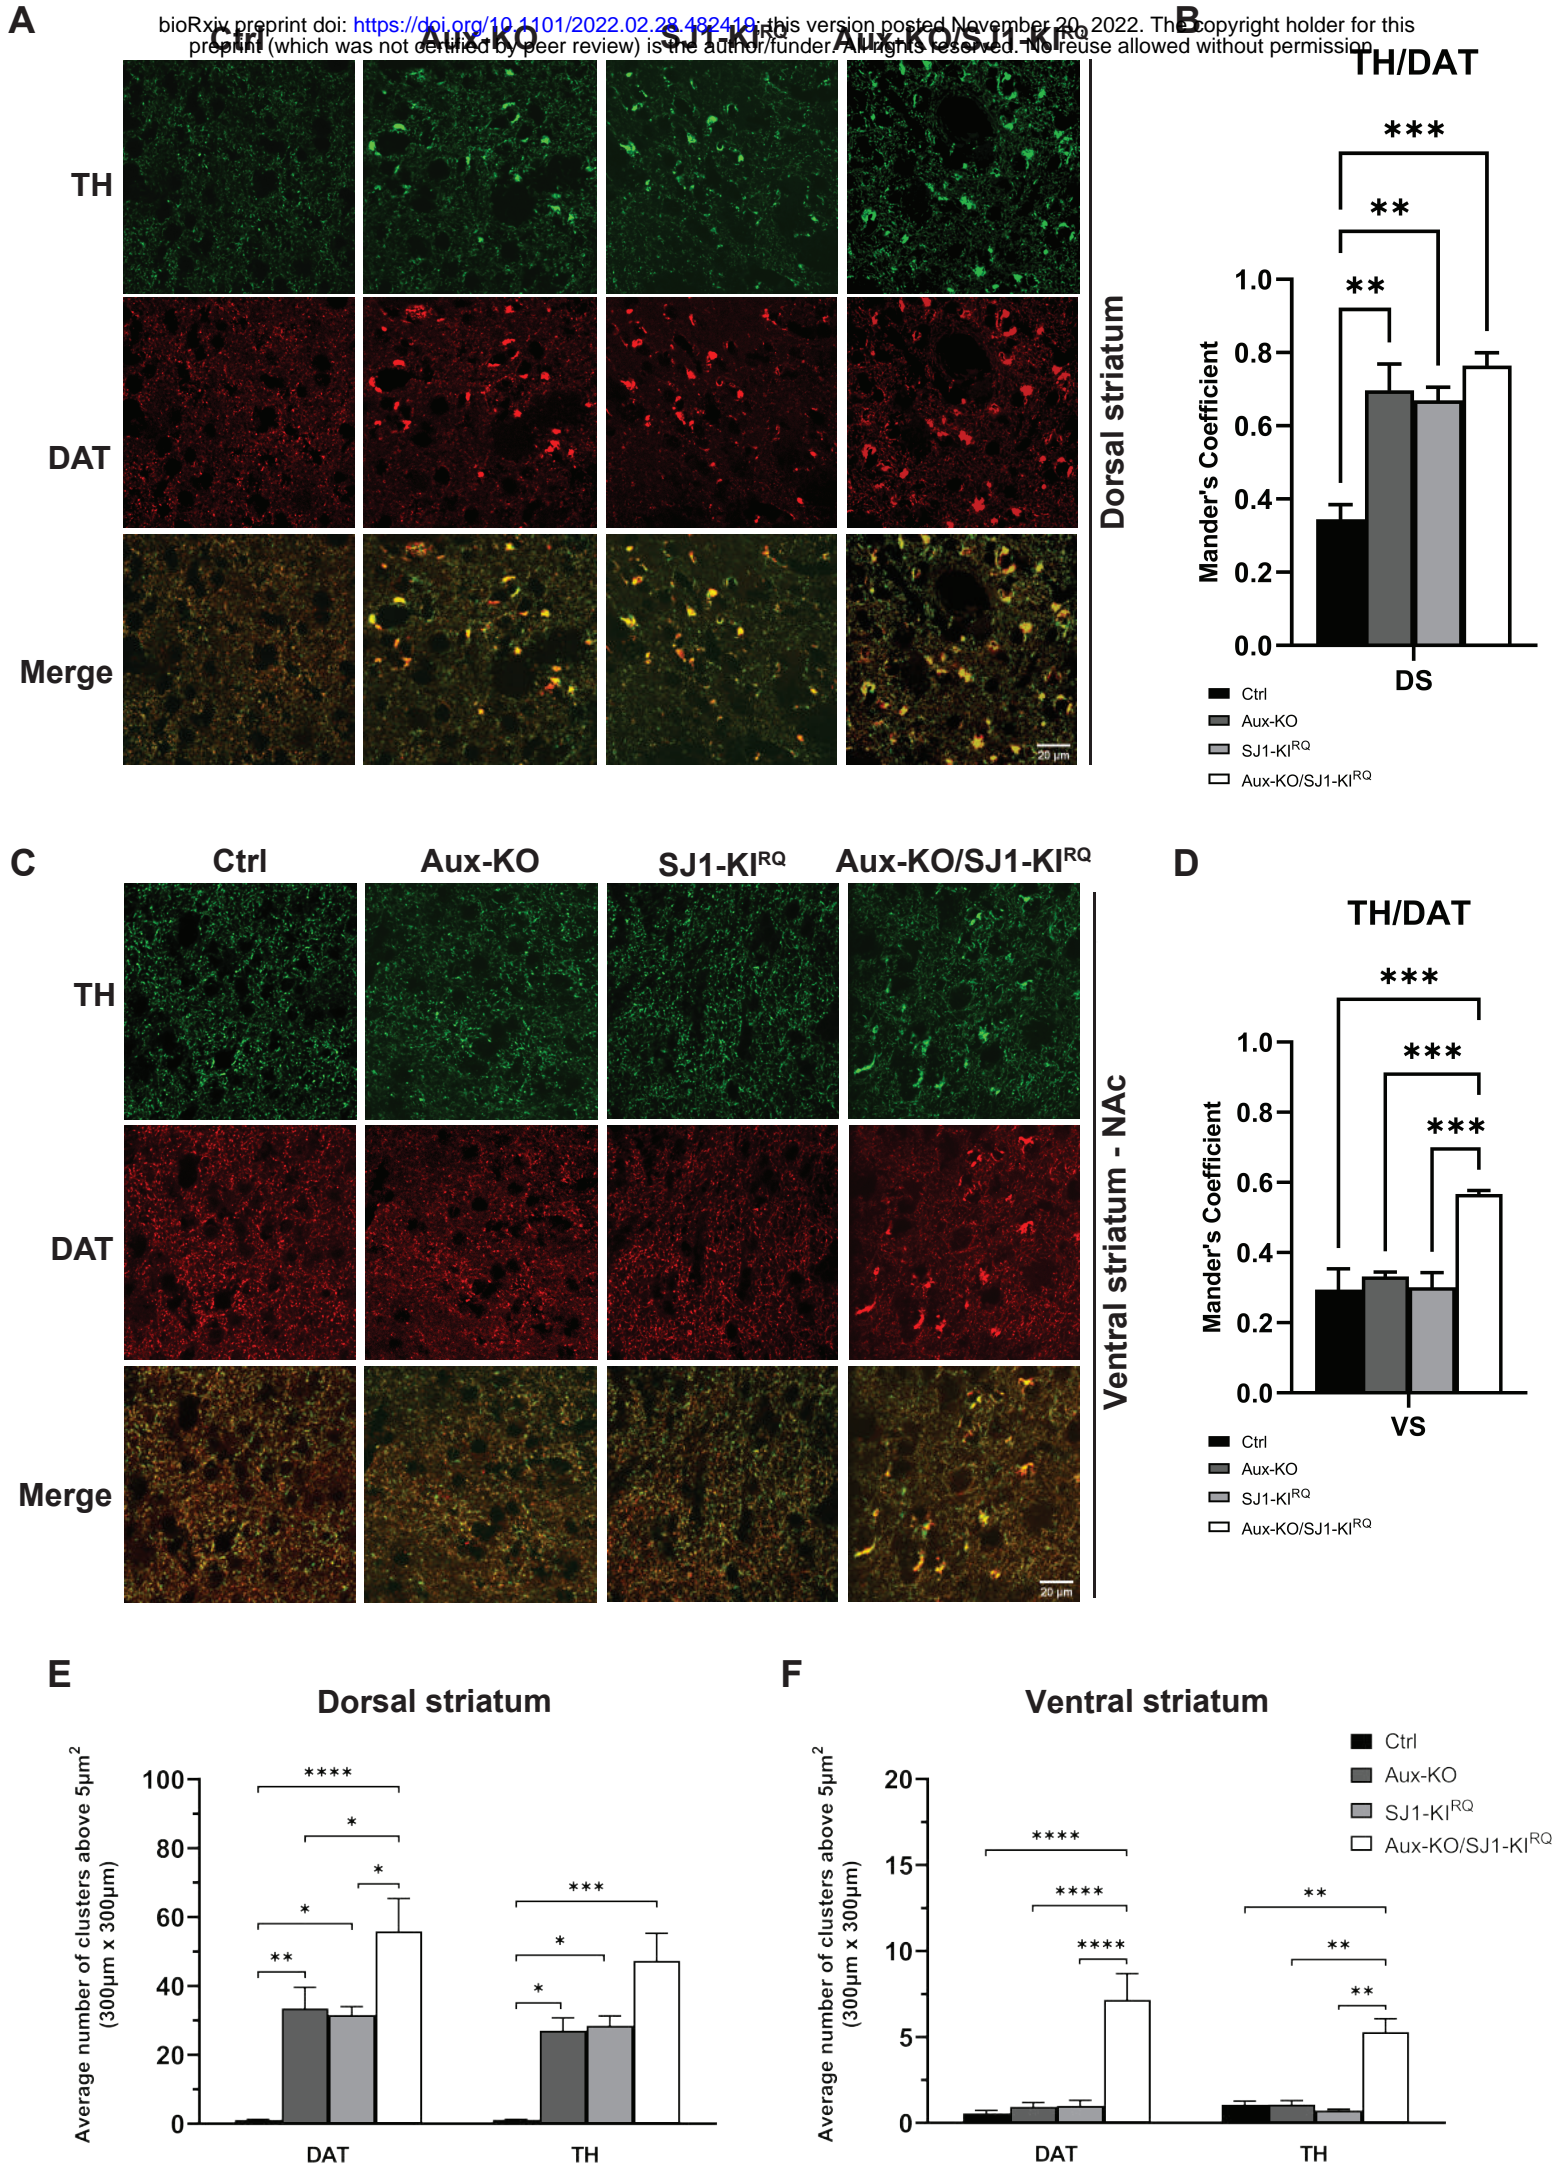

**Fig 4**



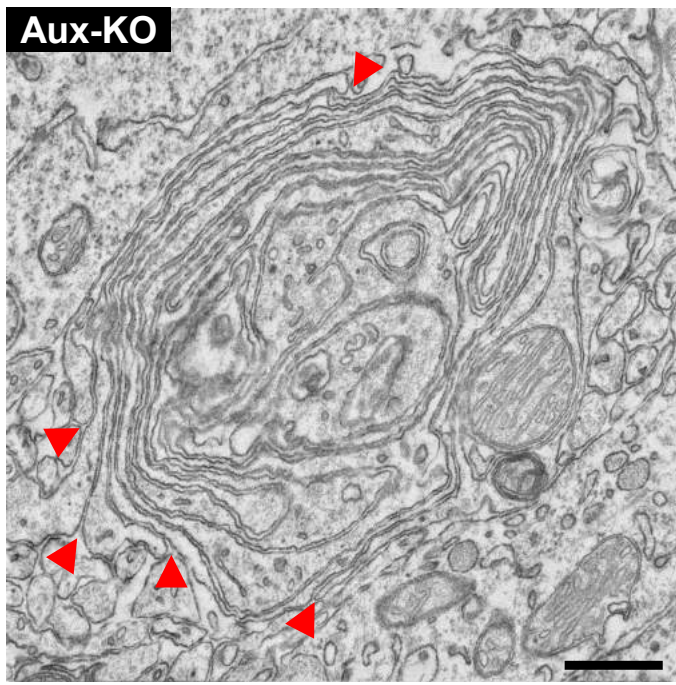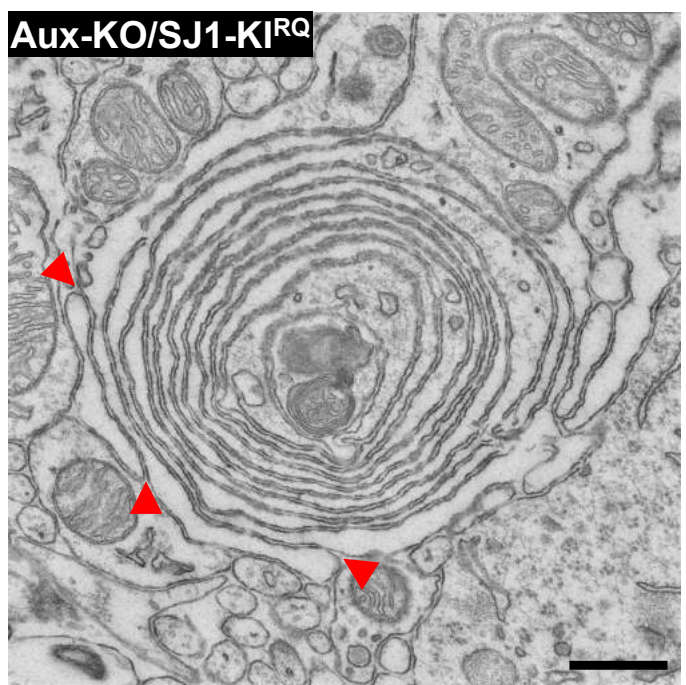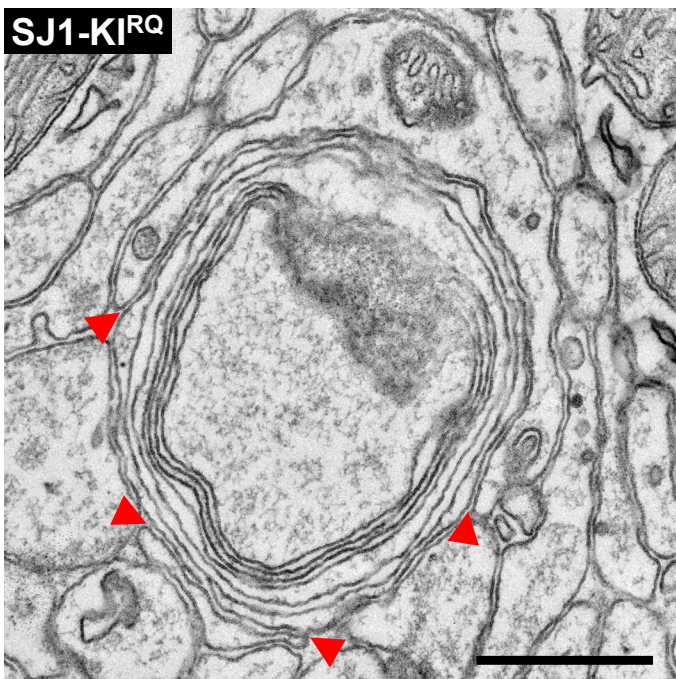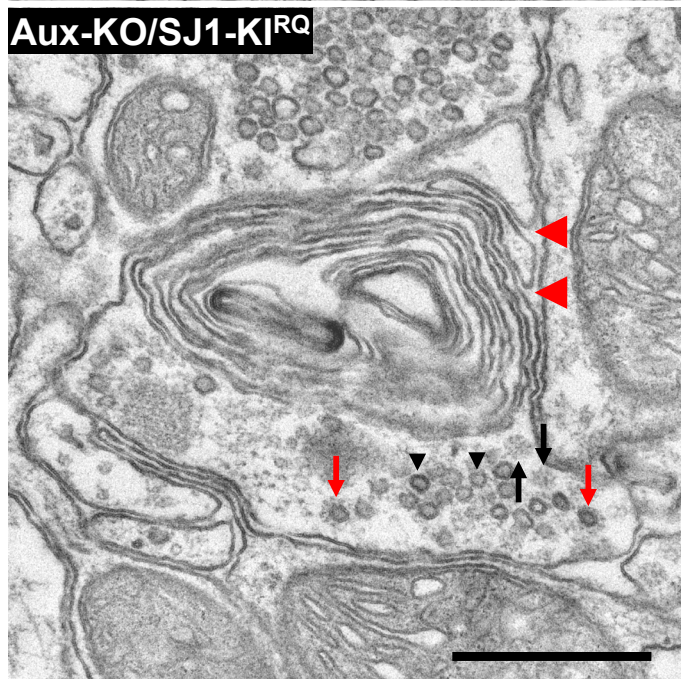

**Fig 5**



**A**

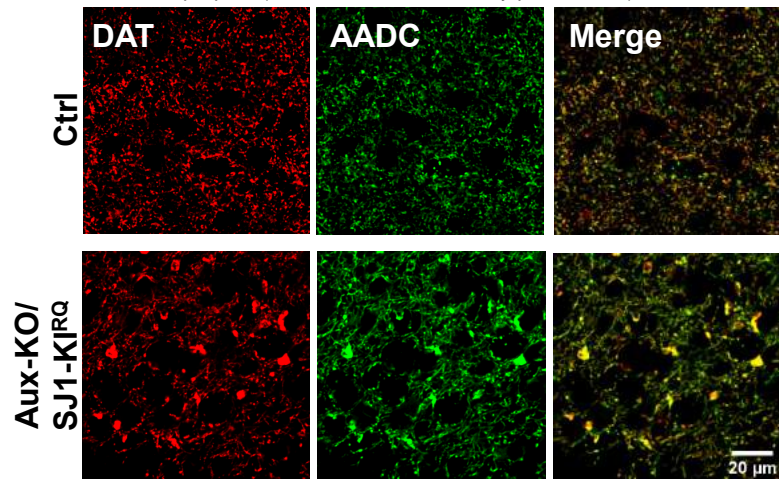

**B**

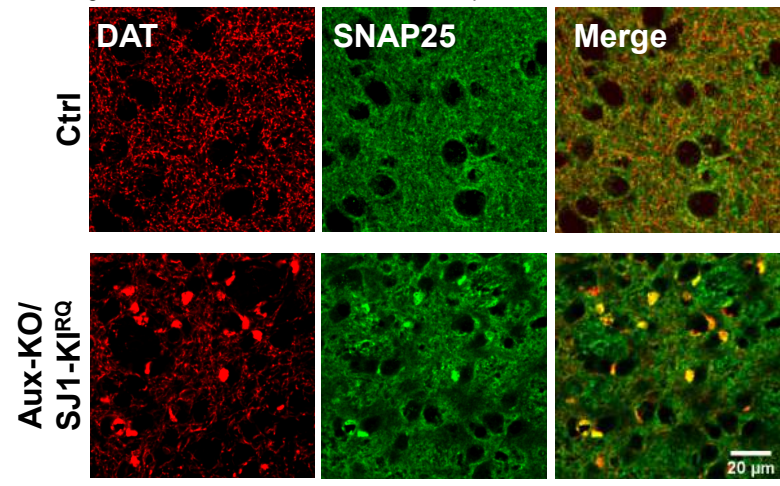

**C**

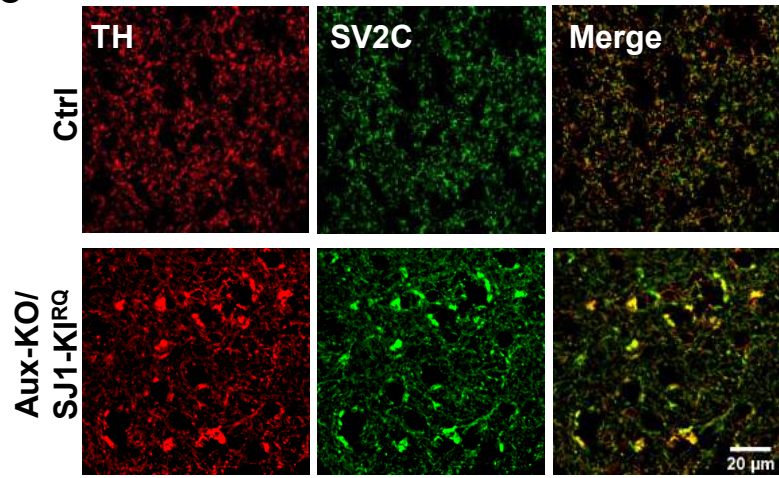

**D**

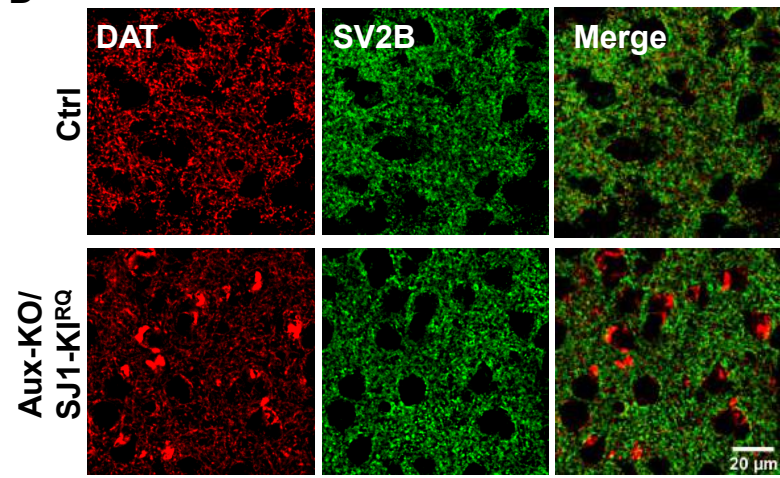

**E**

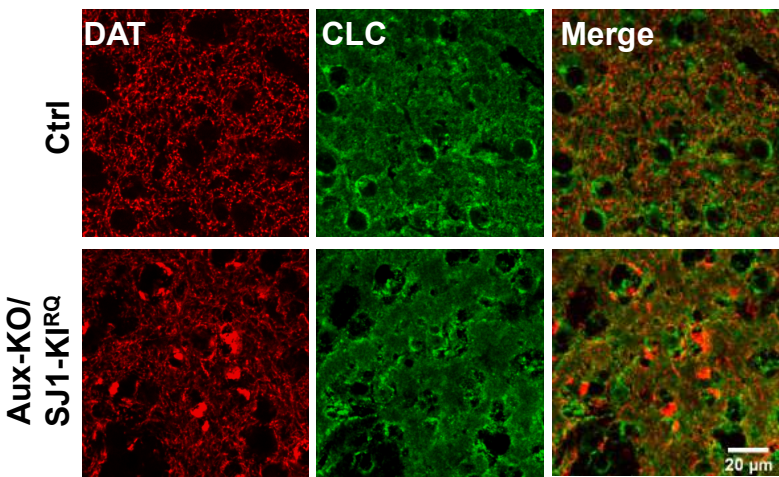

**F**

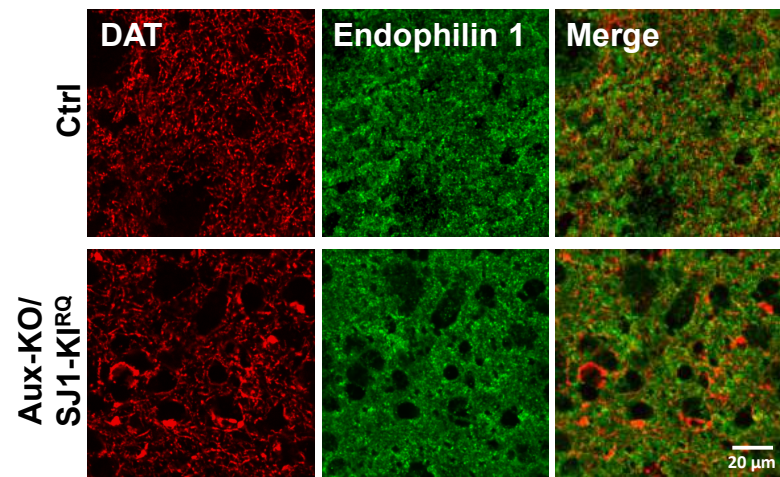

**G**

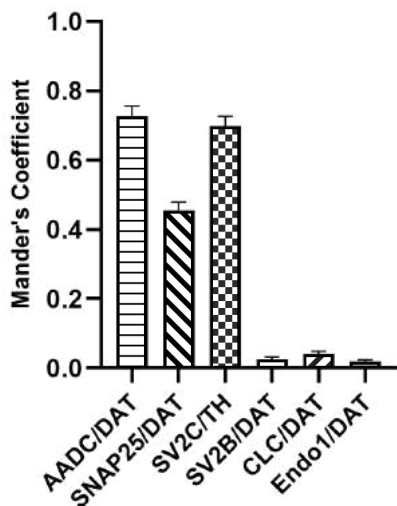

**H**

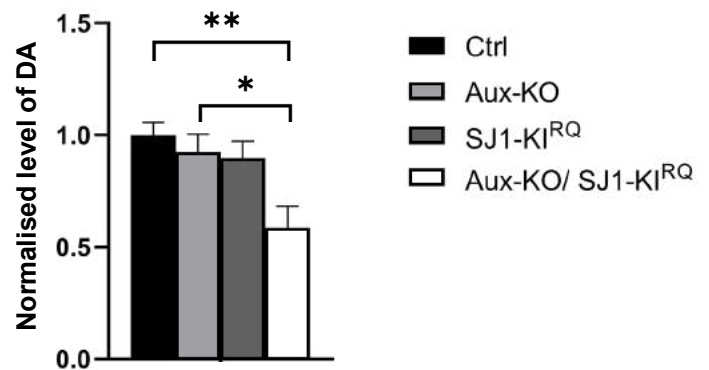

**Fig 6**



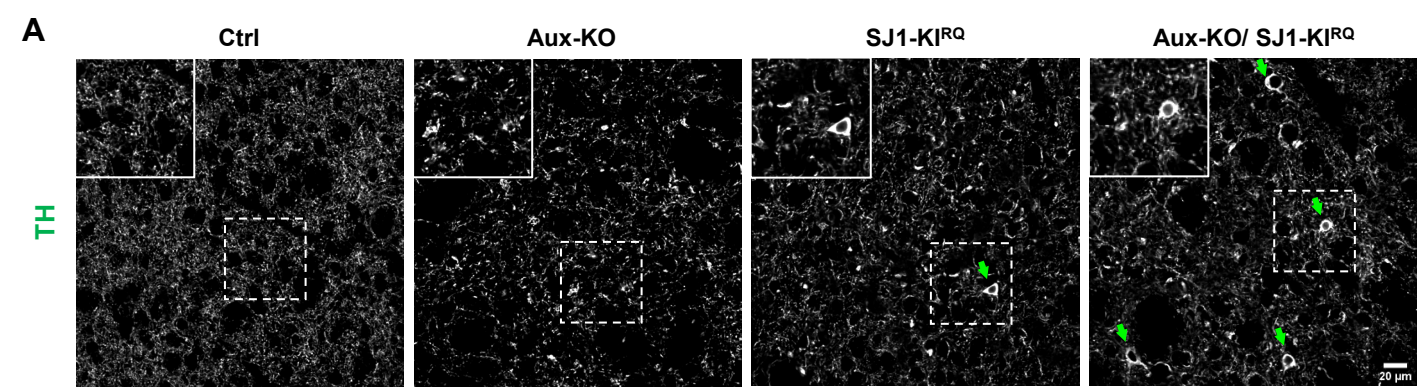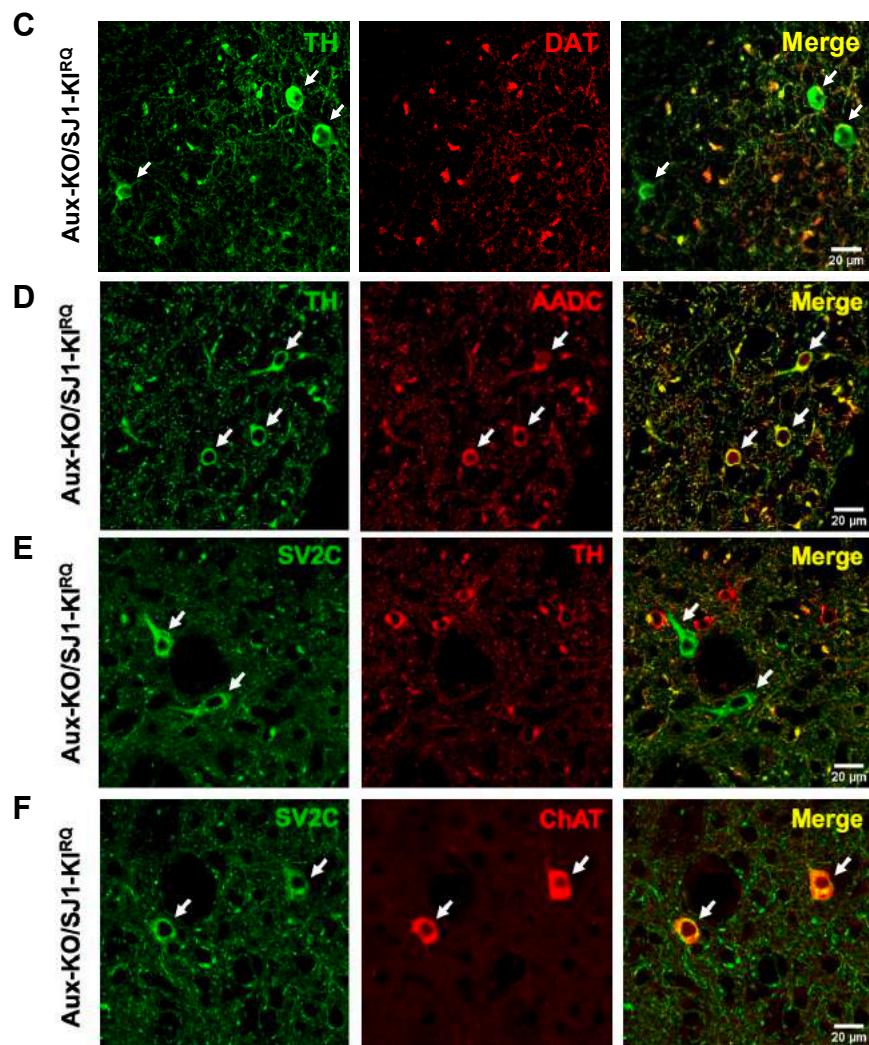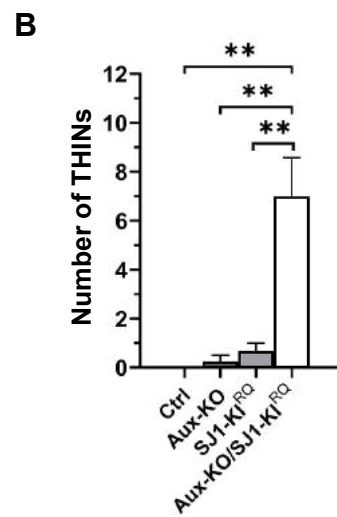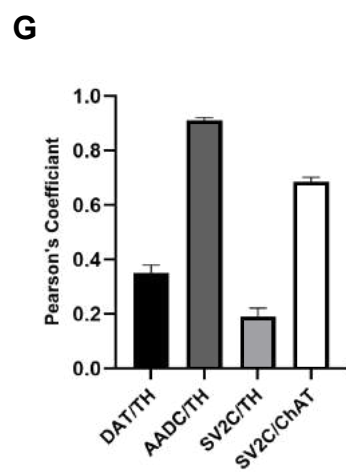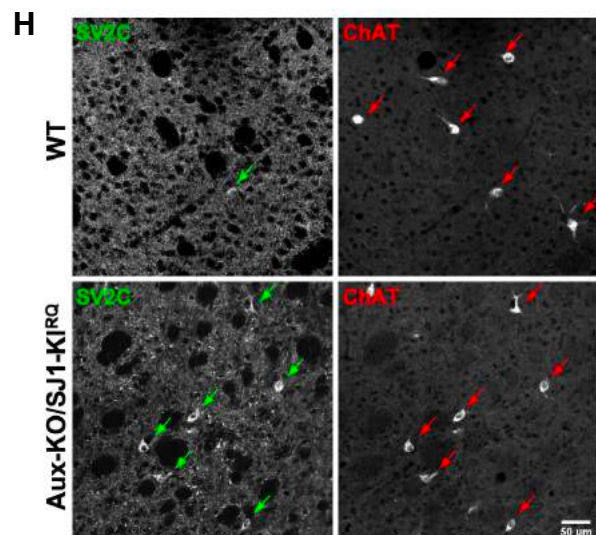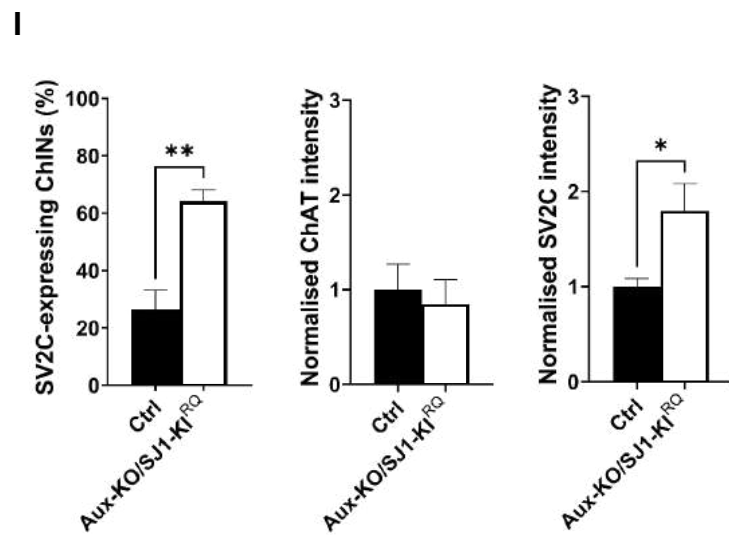

**Fig 7**
